# Supplementary material
Source: PubMed Central journal article supplement (PMC3054036)
Supplement: 1013377108_SD01.pdf [file 1013377108_SD01.pdf]

**Dataset S1.** Summary of intramolecular  $^1\text{H}$  contacts of the PCB chromophore. Crystal distances of  $^1\text{H}^{(\text{N21-N24})} - ^{13}\text{C}$  correlations resolved in Fig. 2 (both Pr and Pfr states) are listed according to the *Synechocystis* Cph1 2VEA Pr (6) and *Pseudomonas aeruginosa* PaBphP 3C2W Pfr (14) structures, respectively. The  $^1\text{H}$  and  $^{13}\text{C}$  chemical shifts of the heteronuclear cross-peaks are referenced to our previous 2D homo- and heteronuclear NMR studies on various states of Cph1 phytochrome (3, 4).

| Cofactor nitrogen | Pr                                               |                 |                                       |                      | Pfr                                              |                 |                                       |                       |
|-------------------|--------------------------------------------------|-----------------|---------------------------------------|----------------------|--------------------------------------------------|-----------------|---------------------------------------|-----------------------|
|                   | $\sigma^{\text{H}(\text{N21-N24})}$ (ppm) [3, 4] | Cofactor carbon | $\sigma^{\text{carbon}}$ (ppm) [3, 4] | XRD distance (Å) [6] | $\sigma^{\text{H}(\text{N21-N24})}$ (ppm) [3, 4] | Cofactor carbon | $\sigma^{\text{carbon}}$ (ppm) [3, 4] | XRD distance (Å) [14] |
| <b>N21</b>        | <b>11.6</b>                                      | 1               | 184.1                                 | 2.02                 | <b>11.7</b>                                      | 1               | 182.9                                 | 1.92                  |
|                   |                                                  | 2               | 37.1                                  | 3.28                 |                                                  | 2               | 37.3                                  | 2.90                  |
|                   |                                                  | 3               | 53.3                                  | 3.31                 |                                                  | 3               | 54.3                                  | 2.92                  |
|                   |                                                  | 4               | 154.0                                 | 2.07                 |                                                  | 4               | 153.7                                 | 1.93                  |
|                   |                                                  | 6               | 149.3                                 | 2.85                 |                                                  | 6               | 149.3                                 | 2.73                  |
|                   |                                                  | 9               | 127.9                                 | 3.69                 |                                                  | 9               | 131.0                                 | 3.42                  |
| <b>N22</b>        | <b>10.9</b>                                      | 1               | 184.1                                 | 3.69                 | <b>11.7</b>                                      | 1               | 182.9                                 | 3.83                  |
|                   |                                                  | 4               | 154.0                                 | 3.05                 |                                                  | 4               | 153.7                                 | 2.90                  |
|                   |                                                  | 6               | 149.3                                 | 2.14                 |                                                  | 6               | 149.3                                 | 1.92                  |
|                   |                                                  | 7               | 125.5                                 | 3.37                 |                                                  | 7               | 126.3                                 | 2.89                  |
|                   |                                                  | 8               | 145.2                                 | 3.32                 |                                                  | 8               | 143.6                                 | 2.93                  |
|                   |                                                  | 9               | 127.9                                 | 2.12                 |                                                  | 9               | 131.0                                 | 1.93                  |
|                   |                                                  | 10              | 112.8                                 | 2.95                 |                                                  | 10              | 112.4                                 | 2.79                  |
|                   |                                                  | 11              | 127.9                                 | 3.37                 |                                                  | 11              | 131.0                                 | 2.98                  |
| <b>N23</b>        | <b>10.9</b>                                      | 9               | 127.9                                 | 3.23                 | <b>10.6</b>                                      | 9               | 131.0                                 | 2.90                  |
|                   |                                                  | 10              | 112.8                                 | 2.86                 |                                                  | 10              | 112.4                                 | 2.76                  |
|                   |                                                  | 11              | 127.9                                 | 2.11                 |                                                  | 11              | 131.0                                 | 1.92                  |
|                   |                                                  | 12              | 145.2                                 | 3.33                 |                                                  | 12              | 145.8                                 | 2.92                  |
|                   |                                                  | 13              | 126.5                                 | 3.31                 |                                                  | 13              | 130.5                                 | 2.88                  |
|                   |                                                  | 14              | 146.1                                 | 2.14                 |                                                  | 14              | 152.0                                 | 1.92                  |
|                   |                                                  | 15              | 93.2                                  | 2.66                 |                                                  | 15              | 91.5                                  | 2.72                  |
|                   |                                                  | 16              | 146.1                                 | 4.09                 |                                                  | -               | -                                     |                       |
| <b>N24</b>        | <b>9.9</b>                                       | 13              | 126.5                                 | 2.76                 | <b>9.6</b>                                       | -               | -                                     | -                     |
|                   |                                                  | 13 <sup>1</sup> | 11.4                                  | 2.10                 |                                                  | -               | -                                     | -                     |
|                   |                                                  | 14              | 146.1                                 | 3.08                 |                                                  | -               | -                                     | -                     |
|                   |                                                  | 15              | 93.2                                  | 2.88                 |                                                  | 15              | 91.5                                  | 2.78                  |
|                   |                                                  | 16              | 146.1                                 | 2.14                 |                                                  | 16              | 151.1                                 | 1.93                  |
|                   |                                                  | 17              | 142.1                                 | 3.25                 |                                                  | 17              | 137.7                                 | 2.90                  |
|                   |                                                  | 18              | 134.2                                 | 3.30                 |                                                  | 18              | 140.4                                 | 2.90                  |
|                   |                                                  | 19              | 173.7                                 | 2.14                 |                                                  | 19              | 169.0                                 | 1.93                  |
