# Supplementary material
Source: PubMed Central journal article supplement (PMC3054036)
Supplement: 1013377108_SD02.pdf [file 1013377108_SD02.pdf]

**Dataset S2.** Amino acids close to the PCB chromophore (within the region of  $\sim 3.5$  Å). The signals labeled with the Latin capitals A to O in Fig. 2 correspond to intermolecular  $^1\text{H}$  correlations of the uniformly  $^{13}\text{C}$ -labeled chromophore (acquired with a relatively short LG-CP contact time of 900  $\mu\text{s}$ ).

| Labels | Proton contact      | Pr                             |                 |                                       |                      | Pfr                            |                 |                                       |                       |
|--------|---------------------|--------------------------------|-----------------|---------------------------------------|----------------------|--------------------------------|-----------------|---------------------------------------|-----------------------|
|        |                     | $\sigma^{\text{proton}}$ (ppm) | Cofactor carbon | $\sigma^{\text{carbon}}$ (ppm) [3, 4] | XRD distance (Å) [6] | $\sigma^{\text{proton}}$ (ppm) | Cofactor carbon | $\sigma^{\text{carbon}}$ (ppm) [3, 4] | XRD distance (Å) [14] |
| A      | Tyr-257 N           | 9.8                            | 8 <sup>3</sup>  | 180.1                                 | 3.69                 | -                              | -               | -                                     | -                     |
| B      | Thr-274 OG1         | 10.7                           | 12 <sup>3</sup> | 179.0                                 | 3.14                 | -                              | -               | -                                     | -                     |
| C      | Arg-222 NH1         | -                              | -               | -                                     | -                    | 11.5                           | 8 <sup>3</sup>  | 180.5                                 | 3.16                  |
| D      | Thr-274 OG1         | -                              | -               | -                                     | -                    | 10.6                           | 12 <sup>3</sup> | 175.3                                 | -                     |
| E      | His-290 NE2 (Pr-II) | 12.7                           | 19              | 172.7                                 | 3.87                 | -                              | -               | -                                     | -                     |
| F      | Tyr-263 CE1         | -                              | -               | -                                     | -                    | 9.2                            | 19              | 169.0                                 | 4.30                  |
| G      | His-260 CE1         | -                              | -               | -                                     | -                    | 10.1                           | 9/11            | 131.0                                 | 3.52/3.26             |
| H      | His-260 CE1         | 10.0                           | 11              | 127.9                                 | 3.25                 | -                              | -               | -                                     | -                     |
| I      | His-260 CE1         | 10.0                           | 10              | 112.8                                 | 3.54                 | -                              | -               | -                                     | -                     |
| J      | His-260 ND1-I       | 12.3                           | 10              | 112.8                                 | 3.39                 | -                              | -               | -                                     | -                     |
| K      | His-260 NE2         | -                              | -               | -                                     | -                    | 13.1                           | 10              | 112.4                                 | 3.94                  |
| L      | Thr-274 OG1         | 10.7                           | 12 <sup>2</sup> | 38.1                                  | 3.14                 | -                              | -               | -                                     | -                     |
| M      | Tyr-198 CD2         | 9.7                            | 18 <sup>2</sup> | 13.2                                  | 3.46                 | -                              | -               | -                                     | -                     |
| N      | Tyr-257 CD2         | 9.6                            | 7 <sup>1</sup>  | 9.3                                   | 3.34                 | -                              | -               | -                                     | -                     |
| O      | Tyr-203 CD1         | -                              | -               | -                                     | -                    | 10.1                           | 17 <sup>1</sup> | 9.2                                   | 5.98                  |
