# Supplementary material
Source: PubMed Central journal article supplement (PMC3054036)
Supplement: 1013377108_SD03.pdf [file 1013377108_SD03.pdf]

**Dataset S3.** Overview of the interfacial  $^1\text{H}$  contacts of the PCB chromophore. The data were obtained from  $u\text{-}^{13}\text{C},^{15}\text{N}$ -PCB-Cph1Δ2 with an LG-CP contact time of 2.3 ms in both Pr and Pfr states.  $^{13}\text{C}$  NMR chemical shifts of the chromophore based on the published sources (3, 4) are given in parentheses.  $^1\text{H}$  NMR chemical shift differences ( $\Delta\sigma^{\text{H}}$ ) of the chromophore contacts during Pr-to-Pfr photoconversion are listed at the right-most column as the values for Pfr minus those for Pr.

| Cofactor carbon | Pr                                            |                |                      |                                        | Pfr                                           |                |                       |                                        | $\Delta\sigma^{\text{proton (Pfr-Pr)}} \text{ (ppm)}$ |
|-----------------|-----------------------------------------------|----------------|----------------------|----------------------------------------|-----------------------------------------------|----------------|-----------------------|----------------------------------------|-------------------------------------------------------|
|                 | $\sigma^{\text{carbon}} \text{ (ppm)}$ [3, 4] | Proton contact | XRD distance (Å) [6] | $\sigma^{\text{proton}} \text{ (ppm)}$ | $\sigma^{\text{carbon}} \text{ (ppm)}$ [3, 4] | Proton contact | XRD distance (Å) [14] | $\sigma^{\text{proton}} \text{ (ppm)}$ |                                                       |
| <b>1</b>        | <b>184.1</b> (184.0)                          | Asp-207 CA     | 3.83                 | 6.4                                    | <b>182.9</b> (182.8)                          | Asp-207 CA     | 3.89                  | 5.8                                    | <b>-0.6</b>                                           |
|                 |                                               | -              | -                    | -                                      |                                               | Asp-207 CB     | 4.46                  | 4.0                                    | -                                                     |
|                 |                                               | Asp-207 N      | 4.55                 | 10.2                                   |                                               | Asp-207 N      | 4.96                  | 10.8                                   | <b>+0.6</b>                                           |
|                 |                                               | -              | -                    | -                                      |                                               | Tyr-263 CD2    | 4.04                  | 9.4                                    | -                                                     |
|                 |                                               | -              | -                    | -                                      |                                               | Tyr-263 CE2    | 4.37                  | 8.8                                    | -                                                     |
|                 |                                               | W1-I           | 3.05                 | 7.2                                    |                                               | -              | -                     | -                                      | -                                                     |
|                 |                                               | W1-II          | 3.05                 | 7.7                                    |                                               | W1             | 3.37                  | 7.1                                    | <b>-0.6</b>                                           |
| <b>2</b>        | <b>37.1</b> (37.1)                            | -              | -                    | -                                      | <b>37.3</b> (37.2)                            | Asp-207 CA     | 4.25                  | 5.8                                    | -                                                     |
|                 |                                               | -              | -                    | -                                      |                                               | Asp-207 CB     | 5.13                  | 4.0                                    | -                                                     |
|                 |                                               | -              | -                    | -                                      |                                               | Asp-207 N      | 4.98                  | 10.8                                   | -                                                     |
|                 |                                               | Leu-15 CD2     | 4.80                 | 3.0                                    |                                               | -              | -                     | -                                      | -                                                     |
|                 |                                               | Pro-471 CA     | 4.60                 | 5.7                                    |                                               | Pro-471 CA     | -                     | 5.3                                    | <b>-0.4</b>                                           |
|                 |                                               | -              | -                    | -                                      |                                               | Pro-471 CB     | -                     | 3.4                                    | -                                                     |
|                 |                                               | Tyr-458 CB     | 4.47                 | 3.7                                    |                                               | -              | -                     | -                                      | -                                                     |
| <b>2'</b>       | <b>17.4</b> (17.5)                            | Asp-207 CA     | 4.65                 | 6.4                                    | <b>18.2</b> (18.5)                            | Asp-207 CA     | 4.78                  | 5.8                                    | <b>-0.6</b>                                           |
|                 |                                               | -              | -                    | -                                      |                                               | Asp-207 N      | 5.20                  | 10.8                                   | -                                                     |
|                 |                                               | Leu-15 CD1     | 4.07                 | 3.2                                    |                                               | Leu-15 CD1     | -                     | 2.8                                    | <b>-0.4</b>                                           |
|                 |                                               | Ser-206 CB     | 4.31                 | 4.8                                    |                                               | Ser-206 CB     | 5.57                  | 5.0                                    | <b>+0.2</b>                                           |
|                 |                                               | Ser-206 OG     | 4.25                 | 8.0                                    |                                               | Ser-206 OG     | 5.25                  | 7.4                                    | <b>-0.6</b>                                           |
|                 |                                               | Tyr-458 CB     | 3.68                 | 3.7                                    |                                               | -              | -                     | -                                      | -                                                     |
| <b>3</b>        | <b>53.3</b> (53.4)                            | -              | -                    | -                                      | <b>54.3</b> (54.3)                            | Asp-207 CA     | 4.71                  | 5.8                                    | -                                                     |
|                 |                                               | -              | -                    | -                                      |                                               | Asp-207 N      | 5.39                  | 10.8                                   | -                                                     |
|                 |                                               | Cys-259 CB     | 4.44                 | 3.9                                    |                                               | Cys-259 CB     | -                     | 4.5                                    | <b>+0.6</b>                                           |
|                 |                                               | His-260 N      | 5.61                 | 10.2                                   |                                               | -              | -                     | -                                      | -                                                     |
|                 |                                               | Leu-15 CD2     | 3.82                 | 3.0                                    |                                               | Leu-15 CD2     | -                     | 2.6                                    | <b>-0.4</b>                                           |
|                 |                                               | -              | -                    | -                                      |                                               | Pro-209 CG     | 4.36                  | 5.1                                    | -                                                     |
| <b>3'</b>       | <b>47.5</b> (47.6)                            | Cys-259 CA     | 4.29                 | 5.6                                    | <b>49.9</b> (50.0)                            | Cys-259 CA     | -                     | 6.2                                    | <b>+0.6</b>                                           |
|                 |                                               | Cys-259 CB     | 3.07                 | 3.9                                    |                                               | Cys-259 CB     | -                     | 4.5                                    | <b>+0.6</b>                                           |
|                 |                                               | Leu-15 CD2     | 4.49                 | 3.0                                    |                                               | Leu-15 CD2     | -                     | 2.6                                    | <b>-0.4</b>                                           |
|                 |                                               | -              | -                    | -                                      |                                               | Pro-209 CD     | 4.72                  | 5.6                                    | -                                                     |
|                 |                                               | -              | -                    | -                                      |                                               | Pro-209 CG     | 3.96                  | 5.1                                    | -                                                     |
|                 |                                               | -              | -                    | -                                      |                                               | Pro-209 N      | 5.83                  | 11.8                                   | -                                                     |
|                 |                                               | Pro-471 N      | 4.94                 | 11.5                                   |                                               | -              | -                     | -                                      | -                                                     |

| Cofactor carbon      | Pr                                    |                |                      |                                | Pfr                                   |                |                       |                                | $\Delta\sigma^{\text{proton}}(\text{Pfr-Pr})$ (ppm) |
|----------------------|---------------------------------------|----------------|----------------------|--------------------------------|---------------------------------------|----------------|-----------------------|--------------------------------|-----------------------------------------------------|
|                      | $\sigma^{\text{carbon}}$ (ppm) [3, 4] | Proton contact | XRD distance (Å) [6] | $\sigma^{\text{proton}}$ (ppm) | $\sigma^{\text{carbon}}$ (ppm) [3, 4] | Proton contact | XRD distance (Å) [14] | $\sigma^{\text{proton}}$ (ppm) |                                                     |
| <b>3<sup>2</sup></b> | <b>21.9</b> (21.8)                    | -              | -                    | -                              | <b>21.4</b> (21.4)                    | Cys-259 CA     | -                     | 6.2                            | -                                                   |
|                      |                                       | Cys-259 CB     | 3.59                 | 3.9                            |                                       | Cys-259 CB     | -                     | 4.5                            | <b>+0.6</b>                                         |
|                      |                                       | His-470 CA     | 4.26                 | 6.7                            |                                       | -              | -                     | -                              | -                                                   |
|                      |                                       | His-470 N      | 3.96                 | 10.4                           |                                       | His-470 N      | -                     | 9.8                            | <b>-0.6</b>                                         |
|                      |                                       | Leu-469 CB     | 3.39                 | 3.2                            |                                       | Leu-469 CB     | -                     | 3.4                            | <b>+0.2</b>                                         |
|                      |                                       | -              | -                    | -                              |                                       | Pro-209 CG     | 4.05                  | 5.1                            | -                                                   |
|                      |                                       | Pro-471 CD     | 4.63                 | 5.3                            |                                       | -              | -                     | -                              | -                                                   |
| Pro-471 N            | 4.22                                  | 11.5           | Pro-471 N            | -                              | 11.4                                  | <b>-0.1</b>    |                       |                                |                                                     |
| <b>4</b>             | <b>154.0</b> (153.9)                  | Leu-15 CD2     | 4.39                 | 3.0                            | <b>153.7</b> (153.5)                  | Leu-15 CD2     | -                     | 2.6                            | <b>-0.4</b>                                         |
| <b>6</b>             | <b>149.3</b> (149.5)                  | His-260 N      | 4.71                 | 10.2                           | <b>149.3</b> (149.3)                  | -              | -                     | -                              | -                                                   |
|                      |                                       | Pro-209 CD     | 3.49                 | 5.7                            |                                       | Pro-209 CD     | 3.71                  | 5.6                            | <b>-0.1</b>                                         |
|                      |                                       | -              | -                    | -                              |                                       | Pro-209 CG     | 4.26                  | 5.1                            | -                                                   |
| <b>7</b>             | <b>125.5</b> (125.7)                  | -              | -                    | -                              | <b>126.3</b> (126.1)                  | Ala-212 CB     | 4.17                  | 4.2                            | -                                                   |
|                      |                                       | -              | -                    | -                              |                                       | His-260 CA     | 4.90                  | 6.0                            | -                                                   |
|                      |                                       | His-260 CB     | 3.97                 | 5.1                            |                                       | His-260 CB     | 3.65                  | 4.8                            | <b>-0.3</b>                                         |
|                      |                                       | His-260 CD2-II | 5.49                 | 11.4                           |                                       | His-260 CD2    | 4.89                  | 11.0                           | <b>-0.4</b>                                         |
|                      |                                       | His-260 CE1    | 6.02                 | 10.0                           |                                       | His-260 CE1    | 5.42                  | 10.1                           | <b>+0.1</b>                                         |
|                      |                                       | His-260 N      | 4.78                 | 10.2                           |                                       | -              | -                     | -                              | -                                                   |
|                      |                                       | Pro-209 CD     | 4.12                 | 5.7                            |                                       | -              | -                     | -                              | -                                                   |
|                      |                                       | -              | -                    | -                              |                                       | Pro-209 N      | 5.43                  | 11.8                           | -                                                   |
| <b>7<sup>1</sup></b> | <b>9.3</b> (9.2)                      | -              | -                    | -                              | <b>9.2</b> (9.3)                      | Ala-212 CB     | 4.20                  | 4.2                            | -                                                   |
|                      |                                       | -              | -                    | -                              |                                       | His-260 CB     | 4.23                  | 4.8                            | -                                                   |
|                      |                                       | His-260 N      | 5.05                 | 10.2                           |                                       | His-260 N      | 5.30                  | 10.3                           | <b>+0.1</b>                                         |
|                      |                                       | -              | -                    | -                              |                                       | Ile-20 CG2     | -                     | 2.0                            | -                                                   |
|                      |                                       | Leu-18 CD1     | 3.99                 | 2.5                            |                                       | -              | -                     | -                              | -                                                   |
|                      |                                       | -              | -                    | -                              |                                       | Pro-209 CD     | 4.56                  | 5.6                            | -                                                   |
|                      |                                       | Tyr-257 CB     | 3.47                 | 4.5                            |                                       | Tyr-257 CB     | -                     | 3.6                            | <b>-0.9</b>                                         |
| Tyr-257 CD2          | 3.34                                  | 9.6            | Tyr-257 CD2          | -                              | 9.7                                   | <b>+0.1</b>    |                       |                                |                                                     |

| Cofactor carbon      | Pr                                    |                |                      |                                | Pfr                                   |                |                       |                                | $\Delta\sigma^{\text{proton}}(\text{Pfr-Pr})$ (ppm) |
|----------------------|---------------------------------------|----------------|----------------------|--------------------------------|---------------------------------------|----------------|-----------------------|--------------------------------|-----------------------------------------------------|
|                      | $\sigma^{\text{carbon}}$ (ppm) [3, 4] | Proton contact | XRD distance (Å) [6] | $\sigma^{\text{proton}}$ (ppm) | $\sigma^{\text{carbon}}$ (ppm) [3, 4] | Proton contact | XRD distance (Å) [14] | $\sigma^{\text{proton}}$ (ppm) |                                                     |
| <b>8</b>             | <b>145.2</b> (145.2)                  | Ala-212 CB     | 3.96                 | 3.6                            | <b>143.6</b> (143.8)                  | Ala-212 CB     | 4.01                  | 4.2                            | <b>+0.6</b>                                         |
|                      |                                       | -              | -                    | -                              |                                       | His-260 CA     | 5.30                  | 6.0                            | -                                                   |
|                      |                                       | His-260 CB     | 3.77                 | 5.1                            |                                       | His-260 CB     | 3.89                  | 4.8                            | <b>-0.3</b>                                         |
|                      |                                       | -              | -                    | -                              |                                       | His-260 CD2    | 4.34                  | 11.0                           | -                                                   |
|                      |                                       | His-260 CE1    | 5.14                 | 10.0                           |                                       | His-260 CE1    | 4.68                  | 10.1                           | <b>+0.1</b>                                         |
|                      |                                       | His-260 ND1-I  | 4.44                 | 12.3                           |                                       | -              | -                     | -                              | -                                                   |
|                      |                                       | His-260 NE2-I  | 5.22                 | 17.9                           |                                       | -              | -                     | -                              | -                                                   |
|                      |                                       | His-260 NE2-II | 5.22                 | 14.0                           |                                       | His-260 NE2    | 4.81                  | 13.1                           | <b>-0.9</b>                                         |
|                      |                                       | -              | -                    | -                              |                                       | Ile-208 CG2    | 5.48                  | 3.1                            | -                                                   |
| Pro-209 CD           | 4.36                                  | 5.7            | -                    | -                              | -                                     | -              |                       |                                |                                                     |
| W1-II                | 5.18                                  | 7.7            | -                    | -                              | -                                     | -              |                       |                                |                                                     |
| <b>8'</b>            | <b>22.8</b> (21.8)                    | Ala-212 CB     | 3.87                 | 3.6                            | <b>22.9</b> (23.1)                    | Ala-212 CB     | 3.83                  | 4.2                            | <b>+0.6</b>                                         |
|                      |                                       | His-260 CB     | 4.17                 | 5.1                            |                                       | His-260 CB     | 4.67                  | 4.8                            | <b>-0.3</b>                                         |
|                      |                                       | His-260 CD2-I  | 4.39                 | 15.4                           |                                       | -              | -                     | -                              | -                                                   |
|                      |                                       | His-260 CD2-II | 4.39                 | 11.4                           |                                       | His-260 CD2    | 4.47                  | 11.0                           | <b>-0.4</b>                                         |
|                      |                                       | His-260 NE2-II | 5.10                 | 14.0                           |                                       | His-260 NE2    | 4.91                  | 13.1                           | <b>-0.9</b>                                         |
|                      |                                       | Ile-20 CD1     | 4.11                 | 2.5                            |                                       | Ile-20 CD1     | -                     | 2.3                            | <b>-0.2</b>                                         |
|                      |                                       | W2             | 4.74                 | 7.9                            |                                       | W2             | -                     | 8.1                            | <b>+0.2</b>                                         |
| <b>8<sup>2</sup></b> | <b>42.9</b> (42.9)                    | -              | -                    | -                              | <b>41.8</b> (41.8)                    | Ala-256 CA     | -                     | 5.7                            | -                                                   |
|                      |                                       | -              | -                    | -                              |                                       | Arg-222 NH1    | 4.62                  | 11.6                           | -                                                   |
|                      |                                       | Arg-254 NH2    | 5.24                 | 10.8                           |                                       | -              | -                     | -                              | -                                                   |
|                      |                                       | His-260 CB     | 4.39                 | 5.1                            |                                       | His-260 CB     | 4.20                  | 4.8                            | <b>-0.3</b>                                         |
|                      |                                       | -              | -                    | -                              |                                       | His-260 CD2    | 3.42                  | 11.0                           | -                                                   |
|                      |                                       | -              | -                    | -                              |                                       | His-260 NE2    | 3.98                  | 13.1                           | -                                                   |
|                      |                                       | Ile-20 CB      | 4.39                 | 3.7                            |                                       | -              | -                     | -                              | -                                                   |
|                      |                                       | Ile-20 CD1     | 3.60                 | 2.5                            |                                       | Ile-20 CD1     | -                     | 2.3                            | <b>-0.2</b>                                         |
|                      |                                       | Ile-20 CG2     | 4.16                 | 3.0                            |                                       | -              | -                     | -                              | -                                                   |
|                      |                                       | Tyr-257 CB     | 3.88                 | 4.5                            |                                       | -              | -                     | -                              | -                                                   |
|                      |                                       | Tyr-257 N      | 3.81                 | 9.8                            |                                       | -              | -                     | -                              | -                                                   |
|                      |                                       | W2             | 4.70                 | 7.9                            |                                       | W2             | -                     | 8.1                            | <b>+0.2</b>                                         |

| Cofactor carbon      | Pr                                   |                |                      |                                | Pfr                                  |                |                       |                                | $\Delta\sigma_{\text{proton}}(\text{Pfr-Pr})$ (ppm) |
|----------------------|--------------------------------------|----------------|----------------------|--------------------------------|--------------------------------------|----------------|-----------------------|--------------------------------|-----------------------------------------------------|
|                      | $\sigma^{\text{carbon}}$ (ppm) [3,4] | Proton contact | XRD distance (Å) [6] | $\sigma^{\text{proton}}$ (ppm) | $\sigma^{\text{carbon}}$ (ppm) [3,4] | Proton contact | XRD distance (Å) [14] | $\sigma^{\text{proton}}$ (ppm) |                                                     |
| <b>8<sup>3</sup></b> | <b>180.1</b> (180.0)                 | Ala-256 CA     | 3.90                 | 6.6                            | <b>180.3</b> (180.5)                 | Ala-256 CA     | -                     | 5.7                            | <b>-0.9</b>                                         |
|                      |                                      | Ala-256 CB     | 3.96                 | 4.0                            |                                      | -              | -                     | -                              |                                                     |
|                      |                                      | -              | -                    | -                              |                                      | Arg-222 CB     | 6.00                  | 3.9                            | -                                                   |
|                      |                                      | -              | -                    | -                              |                                      | Arg-222 CG     | 5.01                  | 2.9                            | -                                                   |
|                      |                                      | -              | -                    | -                              |                                      | Arg-222 NH1    | 3.16                  | 11.6                           | -                                                   |
|                      |                                      | -              | -                    | -                              |                                      | Arg-222 NH2    | 4.00                  | 12.2                           | -                                                   |
|                      |                                      | Arg-254 NH1    | 3.81                 | 8.5                            |                                      | -              | -                     | -                              |                                                     |
|                      |                                      | Arg-254 NH2    | 3.65                 | 10.8                           |                                      | Arg-254 NH2    | 3.97                  | 10.4                           | <b>-0.4</b>                                         |
|                      |                                      | -              | -                    | -                              |                                      | His-260 CB     | 5.57                  | 4.8                            | -                                                   |
|                      |                                      | -              | -                    | -                              |                                      | His-260 CD2    | 4.44                  | 11.0                           | -                                                   |
|                      |                                      | Ile-20 CD1     | 3.53                 | 2.5                            |                                      | Ile-20 CD1     | -                     | 2.3                            | <b>-0.2</b>                                         |
|                      |                                      | Ile-20 CG1     | 4.29                 | 3.2                            |                                      | -              | -                     | -                              | -                                                   |
|                      |                                      | Tyr-257 CB     | 4.45                 | 4.5                            |                                      | -              | -                     | -                              | -                                                   |
| Tyr-257 N            | 3.69                                 | 9.8            | -                    | -                              | -                                    | -              |                       |                                |                                                     |
| W2                   | 3.90                                 | 7.9            | W2                   | -                              | 8.2                                  | <b>+0.3</b>    |                       |                                |                                                     |
| <b>9</b>             | <b>127.9</b> (127.7)                 | -              | -                    | -                              | <b>131.0</b> (129.9)                 | Ala-212 CB     | 4.75                  | 4.2                            | -                                                   |
|                      |                                      | His-260 CB     | 3.76                 | 5.1                            |                                      | -              | -                     | -                              |                                                     |
|                      |                                      | His-260 CD2-I  | 4.32                 | 15.4                           |                                      | -              | -                     | -                              |                                                     |
|                      |                                      | His-260 CD2-II | 4.32                 | 11.4                           |                                      | His-260 CD2    | 4.36                  | 11.0                           | <b>-0.4</b>                                         |
|                      |                                      | His-260 CE1    | 4.24                 | 10.0                           |                                      | His-260 CE1    | 4.04                  | 10.1                           | <b>+0.1</b>                                         |
|                      |                                      | His-260 ND1-I  | 3.61                 | 12.3                           |                                      | -              | -                     | -                              |                                                     |
|                      |                                      | His-260 NE2-I  | 4.63                 | 17.9                           |                                      | -              | -                     | -                              |                                                     |
|                      |                                      | His-260 NE2-II | 4.63                 | 14.0                           |                                      | His-260 NE2    | 4.52                  | 13.1                           | <b>-0.9</b>                                         |
|                      |                                      | -              | -                    | -                              |                                      | Ile-208 CB     | 5.17                  | 4.7                            | -                                                   |
|                      |                                      | Pro-209 CD     | 4.01                 | 5.7                            |                                      | Pro-209 CD     | 4.72                  | 5.6                            | <b>-0.1</b>                                         |
|                      |                                      | W1-I           | 3.90                 | 7.2                            |                                      | -              | -                     | -                              | -                                                   |
| W1-II                | 3.90                                 | 7.7            | W1                   | 3.88                           | 7.1                                  | <b>-0.6</b>    |                       |                                |                                                     |
| <b>10*</b>           | <b>112.8</b> (112.8)                 | His-260 CD2-I  | 3.89                 | 15.4                           | <b>112.4</b> (112.4)                 | -              | -                     | -                              | -                                                   |
|                      |                                      | His-260 CD2-II | 3.89                 | 11.4                           |                                      | His-260 CD2    | 4.46                  | 11.0                           | <b>-0.4</b>                                         |
|                      |                                      | His-260 CE1    | 3.54                 | 10.0                           |                                      | His-260 CE1    | 3.67                  | 10.1                           | <b>+0.1</b>                                         |
|                      |                                      | His-260 ND1-I  | 3.39                 | 12.3                           |                                      | -              | -                     | -                              | -                                                   |
|                      |                                      | His-260 NE2-I  | 3.83                 | 17.9                           |                                      | -              | -                     | -                              | -                                                   |
|                      |                                      | His-260 NE2-II | 3.83                 | 14.0                           |                                      | His-260 NE2    | 4.21                  | 13.1                           | <b>-0.9</b>                                         |

\*Continued on following page.

| Cofactor carbon                 | Pr                                   |                |                      |                                | Pfr                                  |                |                       |                                | $\Delta\sigma^{\text{proton}}(\text{Pfr-Pr})$ (ppm) |   |
|---------------------------------|--------------------------------------|----------------|----------------------|--------------------------------|--------------------------------------|----------------|-----------------------|--------------------------------|-----------------------------------------------------|---|
|                                 | $\sigma^{\text{carbon}}$ (ppm) [3,4] | Proton contact | XRD distance (Å) [6] | $\sigma^{\text{proton}}$ (ppm) | $\sigma^{\text{carbon}}$ (ppm) [3,4] | Proton contact | XRD distance (Å) [14] | $\sigma^{\text{proton}}$ (ppm) |                                                     |   |
| <b>10</b>                       | <b>112.8</b> (112.8)                 | -              | -                    | -                              | <b>112.4</b> (112.4)                 | Ile-208 CB     | 5.02                  | 4.7                            | -                                                   |   |
|                                 |                                      | -              | -                    | -                              |                                      | Ile-208 CD1    | 4.43                  | 2.9                            | -                                                   |   |
|                                 |                                      | Ile-208 CG2    | 4.72                 | 3.5                            |                                      | -              | -                     | -                              | -                                                   | - |
|                                 |                                      | W1-I           | 4.15                 | 7.2                            |                                      | -              | -                     | -                              | -                                                   | - |
|                                 |                                      | W1-II          | 4.15                 | 7.7                            |                                      | W1             | 4.23                  | 7.1                            | -0.6                                                |   |
| <b>11</b>                       | <b>127.9</b> (127.7)                 | His-260 CD2-I  | 4.32                 | 15.4                           | <b>131.0</b> (131.0)                 | -              | -                     | -                              | -                                                   |   |
|                                 |                                      | His-260 CD2-II | 4.32                 | 11.4                           |                                      | His-260 CD2    | 5.12                  | 11.0                           | -0.4                                                |   |
|                                 |                                      | His-260 CE1    | 3.25                 | 10.0                           |                                      | His-260 CE1    | 3.74                  | 10.1                           | +0.1                                                |   |
|                                 |                                      | His-260 ND1-I  | 3.51                 | 12.3                           |                                      | -              | -                     | -                              | -                                                   |   |
|                                 |                                      | His-260 NE2-I  | 3.78                 | 17.9                           |                                      | -              | -                     | -                              | -                                                   |   |
|                                 |                                      | His-260 NE2-II | 3.78                 | 14.0                           |                                      | His-260 NE2    | 4.62                  | 13.1                           | -0.9                                                |   |
|                                 |                                      | -              | -                    | -                              |                                      | Ile-208 CB     | 4.80                  | 4.7                            | -                                                   |   |
|                                 |                                      | -              | -                    | -                              |                                      | Ile-208 CD1    | 3.82                  | 2.9                            | -                                                   |   |
|                                 |                                      | Ile-208 CG2    | 4.26                 | 3.5                            |                                      | Ile-208 CG1    | 3.78                  | 3.3                            | -                                                   |   |
|                                 |                                      | W1-I           | 3.93                 | 7.2                            |                                      | -              | -                     | -                              | -                                                   |   |
| W1-II                           | 3.93                                 | 7.7            | W1                   | 3.78                           | 7.1                                  | -0.6           |                       |                                |                                                     |   |
| <b>12</b>                       | <b>145.2</b> (145.2)                 | His-260 CE1    | 3.55                 | 10.0                           | <b>145.8</b> (145.8)                 | His-260 CE1    | 4.12                  | 10.1                           | +0.1                                                |   |
|                                 |                                      | His-260 ND1-I  | 4.25                 | 12.3                           |                                      | -              | -                     | -                              | -                                                   |   |
|                                 |                                      | His-260 NE2-I  | 3.75                 | 17.9                           |                                      | -              | -                     | -                              | -                                                   |   |
|                                 |                                      | His-260 NE2-II | 3.75                 | 14.0                           |                                      | His-260 NE2    | 4.97                  | 13.1                           | -0.9                                                |   |
|                                 |                                      | -              | -                    | -                              |                                      | Ile-208 CB     | 5.22                  | 4.7                            | -                                                   |   |
|                                 |                                      | -              | -                    | -                              |                                      | Ile-208 CD1    | 3.54                  | 2.9                            | -                                                   |   |
|                                 |                                      | -              | -                    | -                              |                                      | Ile-208 CG1    | 3.99                  | 3.3                            | -                                                   |   |
|                                 |                                      | W1-II          | 5.16                 | 7.7                            |                                      | W1             | 4.75                  | 7.1                            | -0.6                                                |   |
|                                 |                                      | W4 (Pr-II)     | 5.25                 | 8.9                            |                                      | -              | -                     | -                              | -                                                   |   |
|                                 |                                      | -              | -                    | -                              |                                      | W5             | -                     | 8.4                            | -                                                   |   |
| {W5+[OH] <sub>wa</sub> } (Pr-I) | -                                    | 9.4            | -                    | -                              | -                                    | -              |                       |                                |                                                     |   |

| Cofactor carbon | Pr                                            |                                 |                      |                                        | Pfr                                           |                |                       |                                        | $\Delta\sigma^{\text{proton (Pfr-Pr)}} \text{ (ppm)}$ |
|-----------------|-----------------------------------------------|---------------------------------|----------------------|----------------------------------------|-----------------------------------------------|----------------|-----------------------|----------------------------------------|-------------------------------------------------------|
|                 | $\sigma^{\text{carbon}} \text{ (ppm)}$ [3, 4] | Proton contact                  | XRD distance (Å) [6] | $\sigma^{\text{proton}} \text{ (ppm)}$ | $\sigma^{\text{carbon}} \text{ (ppm)}$ [3, 4] | Proton contact | XRD distance (Å) [14] | $\sigma^{\text{proton}} \text{ (ppm)}$ |                                                       |
| 12 <sup>1</sup> | 20.4 (20.4)                                   | His-260 CD2-II                  | 3.89                 | 11.4                                   | 20.6 (20.5)                                   | -              | -                     | -                                      | -                                                     |
|                 |                                               | His-260 CE1                     | 3.54                 | 10.0                                   |                                               | His-260 CE1    | 4.67                  | 10.1                                   | +0.1                                                  |
|                 |                                               | His-260 ND1-I                   | 4.89                 | 12.3                                   |                                               | -              | -                     | -                                      | -                                                     |
|                 |                                               | His-260 NE2-I                   | 3.83                 | 17.9                                   |                                               | -              | -                     | -                                      | -                                                     |
|                 |                                               | His-260 NE2-II                  | 3.83                 | 14.0                                   |                                               | His-260 NE2    | 5.19                  | 13.1                                   | -0.9                                                  |
|                 |                                               | -                               | -                    | -                                      |                                               | Ile-208 CD1    | 3.79                  | 2.9                                    | -                                                     |
|                 |                                               | -                               | -                    | -                                      |                                               | Ile-208 CG1    | 4.68                  | 3.3                                    | -                                                     |
|                 |                                               | Phe-216 CE2                     | 3.78                 | 7.3                                    |                                               | Phe-216 CE2    | -                     | 7.0                                    | -0.3                                                  |
|                 |                                               | Phe-216 CZ                      | 4.14                 | 6.8                                    |                                               | Phe-216 CZ     | -                     | 6.5                                    | -0.3                                                  |
|                 |                                               | Thr-274 CG2                     | 4.72                 | 2.1                                    |                                               | -              | -                     | -                                      | -                                                     |
|                 |                                               | W2                              | 4.48                 | 7.9                                    |                                               | -              | -                     | -                                      | -                                                     |
|                 |                                               | -                               | -                    | -                                      |                                               | W4             | -                     | 7.9                                    | -                                                     |
|                 |                                               | -                               | -                    | -                                      |                                               | W5             | -                     | 8.4                                    | -                                                     |
| 12 <sup>2</sup> | 38.1 (38.1)                                   | Arg-222 CB                      | 4.71                 | 4.4                                    | 38.4 (38.4)                                   | -              | -                     | -                                      | -                                                     |
|                 |                                               | His-260 CD2-II                  | 5.00                 | 11.4                                   |                                               | -              | -                     | -                                      | -                                                     |
|                 |                                               | His-260 CE1                     | 4.66                 | 10.0                                   |                                               | His-260 CE1    | 4.18                  | 10.1                                   | +0.1                                                  |
|                 |                                               | His-260 NE2-I                   | 4.15                 | 17.9                                   |                                               | -              | -                     | -                                      | -                                                     |
|                 |                                               | His-260 NE2-II                  | 4.15                 | 14.0                                   |                                               | His-260 NE2    | 4.47                  | 13.1                                   | -0.9                                                  |
|                 |                                               | Phe-216 CE2                     | 3.73                 | 7.3                                    |                                               | Phe-216 CE2    | -                     | 7.0                                    | -0.3                                                  |
|                 |                                               | Phe-216 CZ                      | 3.61                 | 6.8                                    |                                               | Phe-216 CZ     | -                     | 6.5                                    | -0.3                                                  |
|                 |                                               | -                               | -                    | -                                      |                                               | Ser-272 OG     | 4.75                  | 6.0                                    | -                                                     |
|                 |                                               | -                               | -                    | -                                      |                                               | Thr-274 CB     | -                     | 3.4                                    | -                                                     |
|                 |                                               | Thr-274 CG2                     | 3.53                 | 2.1                                    |                                               | Thr-274 CG2    | -                     | 2.8                                    | +0.7                                                  |
|                 |                                               | Thr-274 OG1                     | 3.14                 | 10.7                                   |                                               | Thr-274 OG1    | -                     | 10.6                                   | -0.1                                                  |
|                 |                                               | W2                              | 4.44                 | 7.9                                    |                                               | -              | -                     | -                                      | -                                                     |
|                 |                                               | W3                              | 4.31                 | 8.0                                    |                                               | W3             | -                     | 7.5                                    | -0.5                                                  |
|                 |                                               | W4 (Pr-II)                      | 4.59                 | 8.9                                    |                                               | -              | -                     | -                                      | -                                                     |
|                 |                                               | {W5+[OH] <sub>w5</sub> } (Pr-I) | -                    | 9.4                                    |                                               | -              | -                     | -                                      | -                                                     |

| Cofactor carbon                 | Pr                                   |                |                      |                                | Pfr                                  |                |                       |                                | $\Delta\sigma^{\text{proton}}(\text{Pfr-Pr})$ (ppm) |   |
|---------------------------------|--------------------------------------|----------------|----------------------|--------------------------------|--------------------------------------|----------------|-----------------------|--------------------------------|-----------------------------------------------------|---|
|                                 | $\sigma^{\text{carbon}}$ (ppm) [3,4] | Proton contact | XRD distance (Å) [6] | $\sigma^{\text{proton}}$ (ppm) | $\sigma^{\text{carbon}}$ (ppm) [3,4] | Proton contact | XRD distance (Å) [14] | $\sigma^{\text{proton}}$ (ppm) |                                                     |   |
| <b>12<sup>s</sup></b>           | <b>179.0</b> (179.0)                 | Arg-222 CB     | 4.49                 | 4.4                            | <b>175.3</b> (175.3)                 | -              | -                     | -                              | -                                                   |   |
|                                 |                                      | His-260 CD2-II | 3.89                 | 11.4                           |                                      | -              | -                     | -                              | -                                                   | - |
|                                 |                                      | His-260 CE1    | 3.54                 | 10.0                           |                                      | -              | -                     | -                              | -                                                   | - |
|                                 |                                      | His-260 ND1-I  | 5.17                 | 12.3                           |                                      | -              | -                     | -                              | -                                                   | - |
|                                 |                                      | His-260 NE2-I  | 3.83                 | 17.9                           |                                      | -              | -                     | -                              | -                                                   | - |
|                                 |                                      | His-260 NE2-II | 3.83                 | 14.0                           |                                      | His-260 NE2    | 4.88                  | 13.1                           | -0.9                                                |   |
|                                 |                                      | -              | -                    | -                              |                                      | His-290 CE1    | 4.31                  | 9.8                            | -                                                   |   |
|                                 |                                      | -              | -                    | -                              |                                      | His-290 NE2    | 3.55                  | 12.3                           | -                                                   |   |
|                                 |                                      | -              | -                    | -                              |                                      | Phe-216 CZ     | -                     | 6.5                            | -                                                   |   |
|                                 |                                      | Ser-272 OG     | 4.73                 | 7.0                            |                                      | Ser-272 OG     | 4.86                  | 6.0                            | -1.0                                                |   |
|                                 |                                      | Thr-274 CB     | 3.94                 | 3.7                            |                                      | Thr-274 CB     | -                     | 3.4                            | -0.3                                                |   |
|                                 |                                      | Thr-274 OG1    | 3.14                 | 10.7                           |                                      | Thr-274 OG1    | -                     | 10.6                           | -0.1                                                |   |
|                                 |                                      | -              | -                    | -                              |                                      | Tyr-176 OH     | 3.94                  | 9.0                            | -                                                   |   |
|                                 |                                      | W2             | 3.59                 | 7.9                            |                                      | -              | -                     | -                              | -                                                   |   |
|                                 |                                      | W3             | 3.10                 | 8.0                            |                                      | W3             | -                     | 7.5                            | -0.5                                                |   |
|                                 |                                      | W4 (Pr-II)     | 3.50                 | 8.9                            |                                      | W4             | -                     | 7.9                            | -1.0                                                |   |
| -                               | -                                    | -              | W5                   | -                              | 8.5                                  | -              |                       |                                |                                                     |   |
| W6                              | 4.92                                 | 8.4            | -                    | -                              | -                                    | -              |                       |                                |                                                     |   |
| {W5+[OH] <sub>wa</sub> } (Pr-I) | -                                    | 9.4            | -                    | -                              | -                                    | -              |                       |                                |                                                     |   |
| <b>13</b>                       | <b>126.5</b> (126.4)                 | -              | -                    | -                              | <b>130.5</b> (130.7)                 | Asp-207 CB     | 5.57                  | 4.0                            | -                                                   |   |
|                                 |                                      | His-260 CE1    | 3.99                 | 10.0                           |                                      | His-260 CE1    | 4.71                  | 10.1                           | +0.1                                                |   |
|                                 |                                      | His-260 ND1-I  | 4.83                 | 12.3                           |                                      | -              | -                     | -                              | -                                                   |   |
|                                 |                                      | His-260 NE2-I  | 4.47                 | 17.9                           |                                      | -              | -                     | -                              | -                                                   |   |
|                                 |                                      | -              | -                    | -                              |                                      | His-260 NE2    | 5.77                  | 13.1                           | -                                                   |   |
|                                 |                                      | Ile-208 CB     | 4.88                 | 4.4                            |                                      | Ile-208 CB     | 5.42                  | 4.7                            | +0.3                                                |   |
|                                 |                                      | Ile-208 CD1    | 3.76                 | 2.8                            |                                      | Ile-208 CD1    | 3.67                  | 2.9                            | +0.1                                                |   |
|                                 |                                      | Ile-208 CG1    | 4.06                 | 3.4                            |                                      | Ile-208 CG1    | 3.99                  | 3.3                            | -0.1                                                |   |
|                                 |                                      | -              | -                    | -                              |                                      | Tyr-203 CE2    | 5.15                  | 9.3                            | -                                                   |   |
|                                 |                                      | -              | -                    | -                              |                                      | W1             | 4.63                  | 7.1                            | -                                                   |   |
| W5 (Pr-II)                      | 4.32                                 | 7.8            | W5                   | -                              | 8.5                                  | +0.7           |                       |                                |                                                     |   |

| Cofactor carbon                 | Pr                                   |                |                      |                                | Pfr                                  |                |                       |                                | $\Delta\sigma^{\text{proton}}(\text{Pfr-Pr})$ (ppm) |   |
|---------------------------------|--------------------------------------|----------------|----------------------|--------------------------------|--------------------------------------|----------------|-----------------------|--------------------------------|-----------------------------------------------------|---|
|                                 | $\sigma^{\text{carbon}}$ (ppm) [3,4] | Proton contact | XRD distance (Å) [6] | $\sigma^{\text{proton}}$ (ppm) | $\sigma^{\text{carbon}}$ (ppm) [3,4] | Proton contact | XRD distance (Å) [14] | $\sigma^{\text{proton}}$ (ppm) |                                                     |   |
| 13'                             | 11.4 (11.4)                          | -              | -                    | -                              | 11.3 (11.6)                          | Ala-288 CB     | -                     | 3.6                            | -                                                   |   |
|                                 |                                      | His-260 ND1-I  | 6.03                 | 12.3                           |                                      | -              | -                     | -                              | -                                                   | - |
|                                 |                                      | His-260 NE2-I  | 5.32                 | 17.9                           |                                      | -              | -                     | -                              | -                                                   | - |
|                                 |                                      | Ile-208 CD1    | 3.96                 | 2.8                            |                                      | Ile-208 CD1    | 4.15                  | 2.9                            | +0.1                                                |   |
|                                 |                                      | Thr-274 CB     | 4.87                 | 3.7                            |                                      | -              | -                     | -                              | -                                                   |   |
|                                 |                                      | Thr-274 CG2    | 4.20                 | 2.1                            |                                      | -              | -                     | -                              | -                                                   |   |
|                                 |                                      | Thr-274 OG1    | 4.21                 | 10.7                           |                                      | -              | -                     | -                              | -                                                   |   |
|                                 |                                      | -              | -                    | -                              |                                      | Tyr-176 CE1    | 3.47                  | 9.3                            | -                                                   |   |
|                                 |                                      | -              | -                    | -                              |                                      | Tyr-203 CD2    | 5.18                  | 9.8                            | -                                                   |   |
|                                 |                                      | W5 (Pr-II)     | 3.73                 | 7.8                            |                                      | W5             | -                     | 8.5                            | +0.7                                                |   |
| W6                              | 4.53                                 | 8.4            | W6                   | -                              | 7.8                                  | -0.6           |                       |                                |                                                     |   |
| {W5+[OH] <sub>wa</sub> } (Pr-I) | -                                    | 9.4            | -                    | -                              | -                                    | -              | -                     |                                |                                                     |   |
| 14                              | 146.1 (145.9)                        | -              | -                    | -                              | 152.0 (152.0)                        | Asp-207 CB     | 4.51                  | 4.0                            | -                                                   |   |
|                                 |                                      | His-260 CE1    | 3.89                 | 10.0                           |                                      | His-260 CE1    | 4.64                  | 10.1                           | +0.1                                                |   |
|                                 |                                      | His-260 ND1-I  | 4.45                 | 12.3                           |                                      | -              | -                     | -                              | -                                                   |   |
|                                 |                                      | His-260 NE2-I  | 4.72                 | 17.9                           |                                      | -              | -                     | -                              | -                                                   |   |
|                                 |                                      | -              | -                    | -                              |                                      | Ile-208 CB     | 5.27                  | 4.7                            | -                                                   |   |
|                                 |                                      | Ile-208 CD1    | 3.58                 | 2.8                            |                                      | Ile-208 CD1    | 4.13                  | 2.9                            | +0.1                                                |   |
|                                 |                                      | Ile-208 CG1    | 3.44                 | 3.4                            |                                      | Ile-208 CG1    | 3.91                  | 3.3                            | -0.1                                                |   |
|                                 |                                      | -              | -                    | -                              |                                      | Tyr-263 CE2    | 5.35                  | 8.8                            | -                                                   |   |
|                                 |                                      | -              | -                    | -                              |                                      | Tyr-263 OH     | 5.96                  | 7.7                            | -                                                   |   |
|                                 |                                      | W1-II          | 4.05                 | 7.7                            |                                      | W1             | 3.51                  | 7.1                            | -0.6                                                |   |
| {W5+[OH] <sub>wa</sub> } (Pr-I) | -                                    | 9.4            | -                    | -                              | -                                    | -              | -                     |                                |                                                     |   |



| Cofactor carbon | Pr                                    |                |                                 |                                | Pfr                                   |                |                       |                                | $\Delta\sigma_{\text{proton}}(\text{Pfr-Pr})$ (ppm) |
|-----------------|---------------------------------------|----------------|---------------------------------|--------------------------------|---------------------------------------|----------------|-----------------------|--------------------------------|-----------------------------------------------------|
|                 | $\sigma_{\text{carbon}}$ (ppm) [3, 4] | Proton contact | XRD distance (Å) [6]            | $\sigma_{\text{proton}}$ (ppm) | $\sigma_{\text{carbon}}$ (ppm) [3, 4] | Proton contact | XRD distance (Å) [14] | $\sigma_{\text{proton}}$ (ppm) |                                                     |
| 15              | 93.2 (93.2)                           | -              | -                               | -                              | 91.5 (91.6)                           | Asp-207 CA     | 4.51                  | 5.8                            | -                                                   |
|                 |                                       | -              | -                               | -                              |                                       | Asp-207 CB     | 3.63                  | 4.0                            | -                                                   |
|                 |                                       | -              | -                               | -                              |                                       | Asp-207 N      | 5.86                  | 10.8                           | -                                                   |
|                 |                                       | Ile-208 CD1    | 3.74                            | 2.8                            |                                       | -              | -                     | -                              | -                                                   |
|                 |                                       | Ile-208 CG1    | 3.59                            | 3.4                            |                                       | Ile-208 CG1    | 4.61                  | 3.3                            | -0.1                                                |
|                 |                                       | Ile-208 N      | 4.95                            | 10.3                           |                                       | -              | -                     | -                              | -                                                   |
|                 |                                       | -              | -                               | -                              |                                       | Tyr-203 CB     | 5.08                  | 4.6                            | -                                                   |
|                 |                                       | -              | -                               | -                              |                                       | Tyr-203 CD2    | 4.85                  | 9.8                            | -                                                   |
|                 |                                       | Tyr-263 CE1    | 4.33                            | 9.7                            |                                       | Tyr-263 CE1    | 5.00                  | 9.0                            | -0.7                                                |
| -               | -                                     | -              | Tyr-263 OH                      | 4.61                           | 7.7                                   | -              |                       |                                |                                                     |
| -               | -                                     | -              | W1                              | 3.60                           | 7.1                                   | -0.6           |                       |                                |                                                     |
| 16              | 146.1 (145.9)                         | -              | -                               | -                              | 151.1 (151.6)                         | Asp-207 CA     | 5.68                  | 5.8                            | -                                                   |
|                 |                                       | -              | -                               | -                              |                                       | Asp-207 CB     | 4.53                  | 4.0                            | -                                                   |
|                 |                                       | Ile-208 CD1    | 4.44                            | 2.8                            |                                       | -              | -                     | -                              | -                                                   |
|                 |                                       | Ile-208 CG1    | 4.64                            | 3.4                            |                                       | -              | -                     | -                              | -                                                   |
|                 |                                       | -              | -                               | -                              |                                       | Tyr-203 CB     | 4.72                  | 4.6                            | -                                                   |
|                 |                                       | Tyr-263 CE1    | 4.29                            | 9.7                            |                                       | Tyr-263 CE1    | 4.26                  | 9.0                            | -0.7                                                |
|                 |                                       | -              | -                               | -                              |                                       | Tyr-263 OH     | 3.70                  | 7.7                            | -                                                   |
| -               | -                                     | -              | W1                              | 4.58                           | 7.1                                   | -              |                       |                                |                                                     |
| -               | -                                     | -              | -                               | -                              | -                                     | -              | -                     |                                |                                                     |
| -               | -                                     | -              | {W5+[OH] <sub>wa</sub> } (Pr-I) | -                              | 9.4                                   | -              | -                     |                                |                                                     |
| 17              | 142.1 (142.1)                         | -              | -                               | -                              | 137.7 (135.5)                         | Asp-207 CB     | 5.93                  | 4.0                            | -                                                   |
|                 |                                       | His-290 CE1    | 5.46                            | 10.7                           |                                       | -              | -                     | -                              | -                                                   |
|                 |                                       | Tyr-176 CE1    | 4.67                            | 8.8                            |                                       | -              | -                     | -                              | -                                                   |
|                 |                                       | -              | -                               | -                              |                                       | Tyr-203 CB     | 5.72                  | 4.6                            | -                                                   |
|                 |                                       | -              | -                               | -                              |                                       | Tyr-203 CE1    | 4.93                  | 9.5                            | -                                                   |
|                 |                                       | Tyr-263 CE1    | 4.15                            | 9.7                            |                                       | Tyr-263 CE1    | 3.95                  | 9.0                            | -0.7                                                |
| Tyr-263 OH      | 3.54                                  | 8.2            | Tyr-263 OH                      | 3.92                           | 7.7                                   | -0.5           |                       |                                |                                                     |

| Cofactor carbon  | Pr                                    |                     |                      |                                | Pfr                                   |                |                       |                                | $\Delta\sigma^{\text{proton}}(\text{Pfr-Pr})$ (ppm) |   |   |
|------------------|---------------------------------------|---------------------|----------------------|--------------------------------|---------------------------------------|----------------|-----------------------|--------------------------------|-----------------------------------------------------|---|---|
|                  | $\sigma^{\text{carbon}}$ (ppm) [3, 4] | Proton contact      | XRD distance (Å) [6] | $\sigma^{\text{proton}}$ (ppm) | $\sigma^{\text{carbon}}$ (ppm) [3, 4] | Proton contact | XRD distance (Å) [14] | $\sigma^{\text{proton}}$ (ppm) |                                                     |   |   |
| 17'              | 9.9 (9.9)                             | Arg-472 NH1         | 5.42                 | 12.2                           | 9.9 (10.0)                            | -              | -                     | -                              | -                                                   |   |   |
|                  |                                       | Asp-207 CB          | 4.05                 | 4.2                            |                                       | -              | -                     | -                              | -                                                   | - |   |
|                  |                                       | -                   | -                    | -                              |                                       | Met-174 CE     | 5.92                  | 3.2                            | -                                                   | - |   |
|                  |                                       | -                   | -                    | -                              |                                       | Tyr-176 CE2    | 5.93                  | 9.5                            | -                                                   | - |   |
|                  |                                       | Tyr-176 OH          | 4.55                 | 9.1                            |                                       | Tyr-176 OH     | 4.24                  | 9.0                            | -0.1                                                | - |   |
|                  |                                       | Tyr-203 CB          | 4.22                 | 3.7                            |                                       | -              | -                     | -                              | -                                                   | - |   |
|                  |                                       | -                   | -                    | -                              |                                       | Tyr-203 CD1    | 5.98                  | 10.0                           | -                                                   | - |   |
|                  |                                       | Tyr-203 CD2         | 3.67                 | 10.0                           |                                       | -              | -                     | -                              | -                                                   | - |   |
|                  |                                       | -                   | -                    | -                              |                                       | Tyr-203 OH     | 6.65                  | 7.3                            | -                                                   | - |   |
|                  |                                       | Tyr-263 OH          | 2.66                 | 8.2                            |                                       | -              | -                     | -                              | -                                                   | - |   |
|                  |                                       | -                   | -                    | -                              |                                       | W4             | -                     | 7.9                            | -                                                   | - |   |
| -                | -                                     | -                   | W5                   | -                              | 8.4                                   | -              | -                     |                                |                                                     |   |   |
| -                | -                                     | -                   | -                    | -                              | -                                     | -              | -                     | -                              |                                                     |   |   |
| -                | -                                     | -                   | W7                   | 5.56                           | 7.7                                   | -              | -                     | -                              |                                                     |   |   |
| 18               | 134.2 (134.1)                         | -                   | -                    | -                              | 140.4 (140.5)                         | Arg-472 NH1    | -                     | 8.5                            | -                                                   |   |   |
|                  |                                       | His-290 CE1         | 4.42                 | 10.7                           |                                       | -              | -                     | -                              | -                                                   | - |   |
|                  |                                       | His-290 NE2         | 4.60                 | 12.7                           |                                       | -              | -                     | -                              | -                                                   | - |   |
|                  |                                       | Met-174 CE          | 4.65                 | 3.8                            |                                       | -              | -                     | -                              | -                                                   | - |   |
|                  |                                       | Tyr-176 CE1         | 4.72                 | 8.8                            |                                       | -              | -                     | -                              | -                                                   | - |   |
|                  |                                       | -                   | -                    | -                              |                                       | -              | -                     | -                              | -                                                   | - |   |
|                  |                                       | -                   | -                    | -                              |                                       | Tyr-203 CB     | 5.46                  | 4.6                            | -                                                   | - |   |
|                  |                                       | -                   | -                    | -                              |                                       | Tyr-203 CD1    | 4.43                  | 10.0                           | -                                                   | - |   |
|                  |                                       | -                   | -                    | -                              |                                       | Tyr-203 CE1    | 4.75                  | 9.5                            | -                                                   | - |   |
|                  |                                       | Tyr-263 OH          | 4.30                 | 8.2                            |                                       | Tyr-263 CE1    | 4.00                  | 9.0                            | -                                                   | - |   |
| -                | -                                     | -                   | Tyr-263 OH           | 3.55                           | 7.7                                   | -0.5           | -                     |                                |                                                     |   |   |
| 18 <sup>1*</sup> | 16.5 (16.5)                           | His-290 CE1         | 4.55                 | 10.7                           | 15.7 (15.6)                           | -              | -                     | -                              | -                                                   |   |   |
|                  |                                       | His-290 ND1 (Pr-I)  | 5.63                 | 11.7                           |                                       | -              | -                     | -                              | -                                                   | - |   |
|                  |                                       | His-290 NE2 (Pr-II) | 5.10                 | 12.7                           |                                       | -              | -                     | -                              | -                                                   | - |   |
|                  |                                       | Met-174 CE          | 4.22                 | 3.8                            |                                       | Met-174 CE     | 4.73                  | 3.2                            | -0.6                                                | - |   |
|                  |                                       | Met-267 CE          | 4.16                 | 2.9                            |                                       | Met-267 CE     | 4.21                  | 2.6                            | -0.3                                                | - |   |
|                  |                                       | Tyr-203 CD2         | 4.16                 | 10.0                           |                                       | -              | -                     | -                              | -                                                   | - |   |
|                  |                                       | Tyr-203 CE2         | 3.71                 | 9.4                            |                                       | -              | -                     | -                              | -                                                   | - |   |
|                  |                                       | Tyr-203 OH          | 4.00                 | 8.0                            |                                       | -              | -                     | -                              | -                                                   | - |   |
|                  |                                       | -                   | -                    | -                              |                                       | -              | -                     | -                              | -                                                   | - | - |
|                  |                                       | -                   | -                    | -                              |                                       | Tyr-263 CE1    | 4.37                  | 9.0                            | -                                                   | - |   |

\*Continued on following page.

| Cofactor carbon       | Pr                                    |                              |                                          |                                | Pfr                                   |                |                       |                                | $\Delta\sigma_{\text{proton}}(\text{Pfr-Pr})$ (ppm) |
|-----------------------|---------------------------------------|------------------------------|------------------------------------------|--------------------------------|---------------------------------------|----------------|-----------------------|--------------------------------|-----------------------------------------------------|
|                       | $\sigma^{\text{carbon}}$ (ppm) [3, 4] | Proton contact               | XRD distance (Å) [6]                     | $\sigma^{\text{proton}}$ (ppm) | $\sigma^{\text{carbon}}$ (ppm) [3, 4] | Proton contact | XRD distance (Å) [14] | $\sigma^{\text{proton}}$ (ppm) |                                                     |
| <b>18'</b>            | <b>16.5</b> (16.5)                    | Tyr-263 OH                   | 4.56                                     | 8.2                            | <b>15.7</b> (15.6)                    | Tyr-263 OH     | 4.26                  | 7.7                            | <b>-0.5</b>                                         |
|                       |                                       | Val-186 CG2                  | 4.76                                     | 1.6                            |                                       | Val-186 CG2    | 6.19                  | 1.5                            | <b>-0.1</b>                                         |
|                       |                                       | -                            | -                                        | -                              |                                       | W5             | -                     | 8.4                            | -                                                   |
| <b>18<sup>2</sup></b> | <b>13.2</b> (13.2)                    | His-290 CE1                  | 3.48                                     | 10.7                           | <b>13.3</b> (13.3)                    | -              | -                     | -                              | -                                                   |
|                       |                                       | His-290 ND1 ( <b>Pr-I</b> )  | 4.38                                     | 11.7                           |                                       | -              | -                     | -                              | -                                                   |
|                       |                                       | His-290 NE2 ( <b>Pr-II</b> ) | 4.29                                     | 12.7                           |                                       | -              | -                     | -                              | -                                                   |
|                       |                                       | Met-174 CE                   | 2.95                                     | 3.8                            |                                       | -              | -                     | -                              | -                                                   |
|                       |                                       | Met-267 CE                   | 4.25                                     | 2.9                            |                                       | Met-267 CE     | 4.58                  | 2.6                            | <b>-0.3</b>                                         |
|                       |                                       | Tyr-198 CD2                  | 3.46                                     | 10.0                           |                                       | -              | -                     | -                              | -                                                   |
|                       |                                       | Tyr-198 CE2                  | 3.75                                     | 9.4                            |                                       | -              | -                     | -                              | -                                                   |
|                       |                                       | Tyr-203 OH                   | 4.12                                     | 8.0                            |                                       | -              | -                     | -                              | -                                                   |
|                       |                                       | -                            | -                                        | -                              |                                       | Tyr-263 OH     | 4.54                  | 7.7                            | -                                                   |
|                       |                                       | -                            | -                                        | -                              |                                       | Val-186 CG2    | 5.69                  | 1.5                            | -                                                   |
| <b>19</b>             | <b>172.7</b> (172.7)                  | Ala-288 CA                   | 4.48                                     | 6.7                            | <b>169.0</b> (169.1)                  | -              | -                     | -                              | -                                                   |
|                       |                                       | Ala-288 CB                   | 5.88                                     | 3.2                            |                                       | -              | -                     | -                              | -                                                   |
|                       |                                       | -                            | -                                        | -                              |                                       | Arg-472 NH1    | -                     | 8.5                            | -                                                   |
|                       |                                       | His-290 CE1                  | 3.87                                     | 10.7                           |                                       | -              | -                     | -                              | -                                                   |
|                       |                                       | His-290 ND1 ( <b>Pr-I</b> )  | 5.15                                     | 11.7                           |                                       | -              | -                     | -                              | -                                                   |
|                       |                                       | His-290 NE2 ( <b>Pr-II</b> ) | 3.87                                     | 12.7                           |                                       | -              | -                     | -                              | -                                                   |
|                       |                                       | Met-174 CE                   | 4.32                                     | 3.8                            |                                       | -              | -                     | -                              | -                                                   |
|                       |                                       | -                            | -                                        | -                              |                                       | -              | -                     | -                              | -                                                   |
|                       |                                       | -                            | -                                        | -                              |                                       | Tyr-203 CA     | 5.54                  | 5.2                            | -                                                   |
|                       |                                       | -                            | -                                        | -                              |                                       | Tyr-203 CB     | 4.24                  | 4.6                            | -                                                   |
|                       |                                       | -                            | -                                        | -                              |                                       | Tyr-203 CD1    | 3.65                  | 10.0                           | -                                                   |
|                       |                                       | -                            | -                                        | -                              |                                       | Tyr-203 CE1    | 4.34                  | 9.5                            | -                                                   |
|                       |                                       | -                            | -                                        | -                              |                                       | Tyr-263 CE1    | 4.30                  | 9.0                            | -                                                   |
| -                     | -                                     | -                            | Tyr-263 OH                               | 3.04                           | 7.7                                   | -              |                       |                                |                                                     |
| -                     | -                                     | -                            | -                                        | -                              | -                                     | -              |                       |                                |                                                     |
| -                     | -                                     | -                            | -                                        | -                              | -                                     | -              |                       |                                |                                                     |
| -                     | -                                     | -                            | W5 ( <b>Pr-II</b> )                      | 3.75                           | 7.8                                   | -              |                       |                                |                                                     |
| -                     | -                                     | -                            | {W5+[OH] <sub>wa</sub> } ( <b>Pr-I</b> ) | -                              | 9.4                                   | -              |                       |                                |                                                     |
