# Supplementary material
Source: PubMed Central journal article supplement (PMC3054036)
Supplement: 1013377108_SD04.pdf [file 1013377108_SD04.pdf]

**Dataset S4.**  $^{13}\text{C}$  PCB chromophore contacts of the protein residues. The data were obtained from  $u\text{-}[^{13}\text{C},^{15}\text{N}]\text{-PCB-Cph1}\Delta 2$  with an LG-CP contact time of 2.3 ms in both Pr and Pfr states.  $^1\text{H}$  NMR chemical shift differences ( $\Delta\sigma^{\text{H}}$ ) of the chromophore contacts during Pr-to-Pfr photoconversion are listed at the right-most column as the values for Pfr minus those for Pr.

| Proton contact  | Pr                             |                 |                                       |                                   | Pfr                            |                 |                                       |                                    | $\Delta\sigma^{\text{proton (Pfr-Pr)}} \text{ (ppm)}$ |             |
|-----------------|--------------------------------|-----------------|---------------------------------------|-----------------------------------|--------------------------------|-----------------|---------------------------------------|------------------------------------|-------------------------------------------------------|-------------|
|                 | $\sigma^{\text{proton}}$ (ppm) | Cofactor carbon | $\sigma^{\text{carbon}}$ (ppm) [3, 4] | XRD distance ( $\text{\AA}$ ) [6] | $\sigma^{\text{proton}}$ (ppm) | Cofactor carbon | $\sigma^{\text{carbon}}$ (ppm) [3, 4] | XRD distance ( $\text{\AA}$ ) [14] |                                                       |             |
| <b>Ala-212</b>  | <b>CB</b>                      | -               | -                                     | -                                 | -                              | 4.2             | 7                                     | 126.3                              | 4.17                                                  | <b>+0.6</b> |
|                 |                                | -               | -                                     | -                                 | -                              | 4.2             | 7 <sup>1</sup>                        | 9.2                                | 4.20                                                  |             |
|                 |                                | 3.6             | 8                                     | 145.2                             | 3.96                           | 4.2             | 8                                     | 143.6                              | 4.01                                                  |             |
|                 |                                | 3.6             | 8 <sup>1</sup>                        | 22.8                              | 3.87                           | 4.2             | 8 <sup>1</sup>                        | 22.9                               | 3.83                                                  |             |
|                 |                                | -               | -                                     | -                                 | -                              | 4.2             | 9                                     | 131.0                              | 4.75                                                  |             |
| <b>Ala-256</b>  | <b>CA</b>                      | -               | -                                     | -                                 | -                              | 5.7             | 8 <sup>2</sup>                        | 41.8                               | -                                                     | <b>-0.9</b> |
|                 |                                | 6.6             | 8 <sup>3</sup>                        | 180.1                             | 3.90                           | 5.7             | 8 <sup>3</sup>                        | 180.3                              | -                                                     |             |
|                 | <b>CB</b>                      | 4.0             | 8 <sup>3</sup>                        | 180.1                             | 3.96                           | -               | -                                     | -                                  | -                                                     |             |
| <b>Ala-288</b>  | <b>CA</b>                      | 6.7             | 19                                    | 172.7                             | 4.48                           | -               | -                                     | -                                  | -                                                     | <b>-</b>    |
|                 | <b>CB</b>                      | -               | -                                     | -                                 | -                              | 3.6             | 13 <sup>1</sup>                       | 11.3                               | -                                                     |             |
|                 |                                | 3.2             | 19                                    | 172.7                             | 5.88                           | -               | -                                     | -                                  | -                                                     |             |
| <b>Arg-222</b>  | <b>CB</b>                      | -               | -                                     | -                                 | -                              | 3.9             | 8 <sup>3</sup>                        | 180.3                              | 6.00                                                  | <b>-0.5</b> |
|                 |                                | 4.4             | 12 <sup>2</sup>                       | 38.1                              | 4.71                           | -               | -                                     | -                                  | -                                                     |             |
|                 |                                | 4.4             | 12 <sup>3</sup>                       | 179.0                             | 4.49                           | -               | -                                     | -                                  | -                                                     |             |
|                 | <b>CG</b>                      | -               | -                                     | -                                 | -                              | 2.9             | 8 <sup>3</sup>                        | 180.5                              | 5.01                                                  |             |
|                 | <b>NH1</b>                     | -               | -                                     | -                                 | -                              | 11.6            | 8 <sup>2</sup>                        | 41.8                               | 4.62                                                  |             |
|                 |                                | -               | -                                     | -                                 | -                              | 11.6            | 8 <sup>3</sup>                        | 180.3                              | 3.16                                                  |             |
|                 | <b>NH2</b>                     | -               | -                                     | -                                 | -                              | 12.2            | 8 <sup>3</sup>                        | 180.3                              | 4.00                                                  |             |
| <b>Arg-254</b>  | <b>NH1</b>                     | 8.5             | 8 <sup>3</sup>                        | 180.1                             | 3.81                           | -               | -                                     | -                                  | -                                                     | <b>-0.4</b> |
|                 | <b>NH2</b>                     | 10.8            | 8 <sup>2</sup>                        | 180.1                             | 5.24                           | -               | -                                     | -                                  | -                                                     |             |
|                 |                                | 10.8            | 8 <sup>3</sup>                        | 180.1                             | 3.65                           | 10.4            | 8 <sup>3</sup>                        | 180.3                              | 3.97                                                  |             |
| <b>Arg-472</b>  | <b>NH1</b>                     | 12.2            | 17 <sup>1</sup>                       | 9.9                               | 5.42                           | -               | -                                     | -                                  | -                                                     | <b>-3.7</b> |
|                 |                                | -               | -                                     | -                                 | -                              | 8.5             | 18                                    | 140.4                              | -                                                     |             |
|                 |                                | -               | -                                     | -                                 | -                              | 8.5             | 19                                    | 169.0                              | -                                                     |             |
| <b>Asp-207*</b> | <b>CA</b>                      | 6.4             | 1                                     | 184.1                             | 3.83                           | 5.8             | 1                                     | 182.9                              | 3.89                                                  | <b>-0.6</b> |
|                 |                                | -               | -                                     | -                                 | -                              | 5.8             | 2                                     | 37.3                               | 4.25                                                  |             |
|                 |                                | 6.4             | 2 <sup>1</sup>                        | 17.4                              | 4.65                           | 5.8             | 2 <sup>1</sup>                        | 18.2                               | 4.78                                                  |             |
|                 |                                | -               | -                                     | -                                 | -                              | 5.8             | 3                                     | 54.3                               | 4.71                                                  |             |
|                 |                                | -               | -                                     | -                                 | -                              | 5.8             | 15                                    | 91.5                               | 4.51                                                  |             |
|                 |                                | -               | -                                     | -                                 | -                              | 5.8             | 16                                    | 151.1                              | 5.68                                                  |             |

\*Continued on following page.

| Proton contact  | Pr                             |                 |                                      |                      | Pfr                            |                 |                                      |                       | $\Delta\sigma^{\text{proton (Pfr-Pr)}} \text{ (ppm)}$ |             |             |
|-----------------|--------------------------------|-----------------|--------------------------------------|----------------------|--------------------------------|-----------------|--------------------------------------|-----------------------|-------------------------------------------------------|-------------|-------------|
|                 | $\sigma^{\text{proton}}$ (ppm) | Cofactor carbon | $\sigma^{\text{carbon}}$ (ppm) [3,4] | XRD distance (Å) [6] | $\sigma^{\text{proton}}$ (ppm) | Cofactor carbon | $\sigma^{\text{carbon}}$ (ppm) [3,4] | XRD distance (Å) [14] |                                                       |             |             |
| <b>Asp-207</b>  | <b>CB</b>                      | -               | -                                    | -                    | -                              | 4.0             | 1                                    | 182.9                 | 4.46                                                  | <b>-0.2</b> |             |
|                 |                                | -               | -                                    | -                    | -                              | 4.0             | 2                                    | 37.3                  | 5.13                                                  |             |             |
|                 |                                | -               | -                                    | -                    | -                              | 4.0             | 13                                   | 130.5                 | 5.57                                                  |             |             |
|                 |                                | -               | -                                    | -                    | -                              | 4.0             | 14                                   | 152.0                 | 4.51                                                  |             |             |
|                 |                                | -               | -                                    | -                    | -                              | 4.0             | 15                                   | 91.5                  | 3.63                                                  |             |             |
|                 |                                | -               | -                                    | -                    | -                              | 4.0             | 16                                   | 151.1                 | 4.53                                                  |             |             |
|                 |                                | -               | -                                    | -                    | -                              | 4.0             | 17                                   | 137.7                 | 5.93                                                  |             |             |
|                 |                                | 4.2             | 17 <sup>1</sup>                      | 9.9                  | 4.05                           | -               | -                                    | -                     | -                                                     |             |             |
|                 | <b>N</b>                       | 10.2            | 1                                    | 184.1                | 4.55                           | 10.8            | 1                                    | 182.9                 | 4.96                                                  |             | <b>+0.6</b> |
|                 |                                | -               | -                                    | -                    | -                              | 10.8            | 2                                    | 37.3                  | 4.98                                                  |             |             |
|                 |                                | -               | -                                    | -                    | -                              | 10.8            | 2 <sup>1</sup>                       | 18.2                  | 5.20                                                  |             |             |
|                 |                                | -               | -                                    | -                    | -                              | 10.8            | 3                                    | 54.3                  | 5.39                                                  |             |             |
|                 |                                | -               | -                                    | -                    | -                              | 10.8            | 15                                   | 91.5                  | 5.86                                                  |             |             |
| <b>Cys-259</b>  | <b>CA</b>                      | 5.6             | 3 <sup>1</sup>                       | 47.5                 | 4.29                           | 6.2             | 3 <sup>1</sup>                       | 49.9                  | -                                                     | <b>+0.6</b> |             |
|                 |                                | -               | -                                    | -                    | -                              | 6.2             | 3 <sup>2</sup>                       | 21.4                  | -                                                     |             |             |
|                 | <b>CB</b>                      | 3.9             | 3                                    | 53.3                 | 4.44                           | 4.5             | 3                                    | 54.3                  | -                                                     |             | <b>+0.6</b> |
|                 |                                | 3.9             | 3 <sup>1</sup>                       | 47.5                 | 3.07                           | 4.5             | 3 <sup>1</sup>                       | 49.9                  | -                                                     |             |             |
|                 |                                | 3.9             | 3 <sup>2</sup>                       | 21.9                 | 3.59                           | 4.5             | 3 <sup>2</sup>                       | 21.4                  | -                                                     |             |             |
| <b>His-260*</b> | <b>CA</b>                      | -               | -                                    | -                    | -                              | 6.0             | 7                                    | 126.3                 | 4.90                                                  | <b>-</b>    |             |
|                 |                                | -               | -                                    | -                    | -                              | 6.0             | 8                                    | 143.6                 | 5.30                                                  |             |             |
|                 | <b>CB</b>                      | 5.1             | 7                                    | 125.5                | 3.97                           | 4.8             | 7                                    | 126.3                 | 3.65                                                  |             | <b>-0.3</b> |
|                 |                                | -               | -                                    | -                    | -                              | 4.8             | 7 <sup>1</sup>                       | 9.2                   | 4.23                                                  |             |             |
|                 |                                | 5.1             | 8                                    | 145.2                | 3.77                           | 4.8             | 8                                    | 143.6                 | 3.89                                                  |             |             |
|                 |                                | 5.1             | 8 <sup>1</sup>                       | 22.8                 | 4.17                           | 4.8             | 8 <sup>1</sup>                       | 22.9                  | 4.67                                                  |             |             |
|                 |                                | 5.1             | 8 <sup>2</sup>                       | 42.9                 | 4.39                           | 4.8             | 8 <sup>2</sup>                       | 41.8                  | 4.20                                                  |             |             |
|                 |                                | -               | -                                    | -                    | -                              | 4.8             | 8 <sup>3</sup>                       | 180.3                 | 5.57                                                  |             |             |
|                 |                                | 5.1             | 9                                    | 127.9                | 3.76                           | -               | -                                    | -                     | -                                                     |             |             |
|                 | <b>CD2-I</b>                   | 15.4            | 8 <sup>1</sup>                       | 22.8                 | 4.39                           | -               | -                                    | -                     | -                                                     |             | <b>-</b>    |
|                 |                                | 15.4            | 9                                    | 127.9                | 4.32                           | -               | -                                    | -                     | -                                                     |             |             |
|                 |                                | 15.4            | 10                                   | 112.8                | 3.89                           | -               | -                                    | -                     | -                                                     |             |             |
|                 |                                | 15.4            | 11                                   | 127.9                | 4.32                           | -               | -                                    | -                     | -                                                     |             |             |

\*Continued on following page.

| Proton contact  | Pr                             |                 |                                      |                      | Pfr                            |                 |                                      |                       | $\Delta\sigma^{\text{proton (Pfr-Pr)}} \text{ (ppm)}$ |             |      |             |
|-----------------|--------------------------------|-----------------|--------------------------------------|----------------------|--------------------------------|-----------------|--------------------------------------|-----------------------|-------------------------------------------------------|-------------|------|-------------|
|                 | $\sigma^{\text{proton}}$ (ppm) | Cofactor carbon | $\sigma^{\text{carbon}}$ (ppm) [3,4] | XRD distance (Å) [6] | $\sigma^{\text{proton}}$ (ppm) | Cofactor carbon | $\sigma^{\text{carbon}}$ (ppm) [3,4] | XRD distance (Å) [14] |                                                       |             |      |             |
| <b>His-260*</b> | <b>CD2-II</b>                  | 11.4            | 7                                    | 125.5                | 5.49                           | 11.0            | 7                                    | 126.3                 | 4.89                                                  | <b>-0.4</b> |      |             |
|                 |                                | -               | -                                    | -                    | -                              | 11.0            | 8                                    | 143.6                 | 4.34                                                  |             |      |             |
|                 |                                | 11.4            | 8 <sup>1</sup>                       | 22.8                 | 4.39                           | 11.0            | 8 <sup>1</sup>                       | 22.9                  | 4.47                                                  |             |      |             |
|                 |                                | -               | -                                    | -                    | -                              | 11.0            | 8 <sup>2</sup>                       | 41.8                  | 3.42                                                  |             |      |             |
|                 |                                | -               | -                                    | -                    | -                              | 11.0            | 8 <sup>3</sup>                       | 180.3                 | 4.44                                                  |             |      |             |
|                 |                                | 11.4            | 9                                    | 127.9                | 4.32                           | 11.0            | 9                                    | 131.0                 | 4.36                                                  |             |      |             |
|                 |                                | 11.4            | 10                                   | 112.8                | 3.89                           | 11.0            | 10                                   | 112.4                 | 4.46                                                  |             |      |             |
|                 |                                | 11.4            | 11                                   | 127.9                | 4.32                           | 11.0            | 11                                   | 131.0                 | 5.12                                                  |             |      |             |
|                 |                                | 11.4            | 12 <sup>1</sup>                      | 20.4                 | 3.89                           | -               | -                                    | -                     | -                                                     |             |      |             |
|                 |                                | 11.4            | 12 <sup>2</sup>                      | 38.1                 | 5.00                           | -               | -                                    | -                     | -                                                     |             |      |             |
|                 |                                | 11.4            | 12 <sup>3</sup>                      | 179.0                | 3.89                           | -               | -                                    | -                     | -                                                     |             |      |             |
|                 |                                | <b>CE1</b>      | 10.0                                 | 7                    | 125.5                          | 6.02            | 10.1                                 | 7                     | 126.3                                                 |             | 5.42 | <b>+0.1</b> |
|                 |                                |                 | 10.0                                 | 8                    | 145.2                          | 5.14            | 10.1                                 | 8                     | 143.6                                                 |             | 4.68 |             |
|                 |                                |                 | 10.0                                 | 9                    | 127.9                          | 4.24            | 10.1                                 | 9                     | 131.0                                                 |             | 4.04 |             |
|                 | 10.0                           |                 | 10                                   | 112.8                | 3.54                           | 10.1            | 10                                   | 112.4                 | 3.67                                                  |             |      |             |
|                 | 10.0                           |                 | 11                                   | 127.9                | 3.25                           | 10.1            | 11                                   | 131.0                 | 3.74                                                  |             |      |             |
|                 | 10.0                           |                 | 12                                   | 145.2                | 3.55                           | 10.1            | 12                                   | 145.8                 | 4.12                                                  |             |      |             |
|                 | 10.0                           |                 | 12 <sup>1</sup>                      | 20.4                 | 3.54                           | 10.1            | 12 <sup>1</sup>                      | 20.6                  | 4.67                                                  |             |      |             |
|                 | 10.0                           |                 | 12 <sup>2</sup>                      | 38.1                 | 4.66                           | 10.1            | 12 <sup>2</sup>                      | 38.4                  | 4.18                                                  |             |      |             |
|                 | 10.0                           |                 | 12 <sup>3</sup>                      | 179.0                | 3.54                           | -               | -                                    | -                     | -                                                     |             |      |             |
|                 | 10.0                           |                 | 13                                   | 126.5                | 3.99                           | 10.1            | 13                                   | 130.5                 | 4.71                                                  |             |      |             |
|                 | 10.0                           | 14              | 146.1                                | 3.89                 | 10.1                           | 14              | 152.0                                | 4.64                  |                                                       |             |      |             |
|                 | <b>N</b>                       | 10.2            | 3                                    | 53.3                 | 5.61                           | -               | -                                    | -                     | -                                                     | <b>+0.1</b> |      |             |
|                 |                                | 10.2            | 6                                    | 149.3                | 4.71                           | -               | -                                    | -                     | -                                                     |             |      |             |
|                 |                                | 10.2            | 7                                    | 125.5                | 4.78                           | -               | -                                    | -                     | -                                                     |             |      |             |
|                 |                                | 10.2            | 7 <sup>1</sup>                       | 9.3                  | 5.05                           | 10.3            | 7 <sup>1</sup>                       | 9.2                   | 5.30                                                  |             |      |             |
|                 | <b>ND1-I</b>                   | 12.3            | 8                                    | 145.2                | 4.44                           | -               | -                                    | -                     | -                                                     | <b>-</b>    |      |             |
|                 |                                | 12.3            | 9                                    | 127.9                | 3.61                           | -               | -                                    | -                     | -                                                     |             |      |             |
| 12.3            |                                | 10              | 112.8                                | 3.39                 | -                              | -               | -                                    | -                     |                                                       |             |      |             |
| 12.3            |                                | 11              | 127.9                                | 3.51                 | -                              | -               | -                                    | -                     |                                                       |             |      |             |
| 12.3            |                                | 12              | 145.2                                | 4.25                 | -                              | -               | -                                    | -                     |                                                       |             |      |             |
| 12.3            |                                | 12 <sup>1</sup> | 20.4                                 | 4.89                 | -                              | -               | -                                    | -                     |                                                       |             |      |             |

\*Continued on following page.

| Proton contact | Pr                             |                 |                                       |                      | Pfr                            |                 |                                       |                       | $\Delta\sigma^{\text{proton (Pfr-Pr)}} \text{ (ppm)}$ |       |      |      |
|----------------|--------------------------------|-----------------|---------------------------------------|----------------------|--------------------------------|-----------------|---------------------------------------|-----------------------|-------------------------------------------------------|-------|------|------|
|                | $\sigma^{\text{proton}}$ (ppm) | Cofactor carbon | $\sigma^{\text{carbon}}$ (ppm) [3, 4] | XRD distance (Å) [6] | $\sigma^{\text{proton}}$ (ppm) | Cofactor carbon | $\sigma^{\text{carbon}}$ (ppm) [3, 4] | XRD distance (Å) [14] |                                                       |       |      |      |
| <b>His-260</b> | <b>ND1-I</b>                   | 12.3            | 12 <sup>3</sup>                       | 179.0                | 5.17                           | -               | -                                     | -                     | -                                                     | -     |      |      |
|                |                                | 12.3            | 13                                    | 126.5                | 4.83                           | -               | -                                     | -                     | -                                                     | -     |      |      |
|                |                                | 12.3            | 13 <sup>1</sup>                       | 11.4                 | 6.03                           | -               | -                                     | -                     | -                                                     | -     |      |      |
|                |                                | 12.3            | 14                                    | 146.1                | 4.45                           | -               | -                                     | -                     | -                                                     | -     |      |      |
|                | <b>NE2-I</b>                   | 17.9            | 8                                     | 145.2                | 5.22                           | -               | -                                     | -                     | -                                                     | -     | -    |      |
|                |                                | 17.9            | 9                                     | 127.9                | 4.63                           | -               | -                                     | -                     | -                                                     | -     | -    |      |
|                |                                | 17.9            | 10                                    | 112.8                | 3.83                           | -               | -                                     | -                     | -                                                     | -     | -    |      |
|                |                                | 17.9            | 11                                    | 127.9                | 3.78                           | -               | -                                     | -                     | -                                                     | -     | -    |      |
|                |                                | 17.9            | 12                                    | 145.2                | 3.75                           | -               | -                                     | -                     | -                                                     | -     | -    |      |
|                |                                | 17.9            | 12 <sup>1</sup>                       | 20.4                 | 3.83                           | -               | -                                     | -                     | -                                                     | -     | -    |      |
|                |                                | 17.9            | 12 <sup>2</sup>                       | 38.1                 | 4.15                           | -               | -                                     | -                     | -                                                     | -     | -    |      |
|                |                                | 17.9            | 12 <sup>3</sup>                       | 179.0                | 3.83                           | -               | -                                     | -                     | -                                                     | -     | -    |      |
|                |                                | 17.9            | 13                                    | 126.5                | 4.47                           | -               | -                                     | -                     | -                                                     | -     | -    |      |
|                |                                | 17.9            | 13 <sup>1</sup>                       | 11.4                 | 5.32                           | -               | -                                     | -                     | -                                                     | -     | -    |      |
|                | <b>NE2-II</b>                  | 17.9            | 14                                    | 146.1                | 4.72                           | -               | -                                     | -                     | -                                                     | -     | -    |      |
|                |                                | 14.0            | 8                                     | 145.2                | 5.22                           | 13.1            | 8                                     | 143.6                 | 4.81                                                  | -0.9  |      |      |
|                |                                | 14.0            | 8 <sup>1</sup>                        | 22.8                 | 5.10                           | 13.1            | 8 <sup>1</sup>                        | 22.9                  | 4.91                                                  | -     |      |      |
|                |                                | -               | -                                     | -                    | -                              | 13.1            | 8 <sup>2</sup>                        | 41.8                  | 3.98                                                  | -     |      |      |
|                |                                | 14.0            | 9                                     | 127.9                | 4.63                           | 13.1            | 9                                     | 131.0                 | 4.52                                                  | -     |      |      |
|                |                                | 14.0            | 10                                    | 112.8                | 3.83                           | 13.1            | 10                                    | 112.4                 | 4.21                                                  | -     |      |      |
|                |                                | 14.0            | 11                                    | 127.9                | 3.78                           | 13.1            | 11                                    | 131.0                 | 4.62                                                  | -     |      |      |
|                |                                | 14.0            | 12                                    | 145.2                | 3.75                           | 13.1            | 12                                    | 145.8                 | 4.97                                                  | -     |      |      |
|                |                                | 14.0            | 12 <sup>1</sup>                       | 20.4                 | 3.83                           | 13.1            | 12 <sup>1</sup>                       | 20.6                  | 5.19                                                  | -     |      |      |
|                |                                | 14.0            | 12 <sup>2</sup>                       | 38.1                 | 4.15                           | 13.1            | 12 <sup>2</sup>                       | 38.4                  | 4.47                                                  | -     |      |      |
|                |                                | 14.0            | 12 <sup>3</sup>                       | 179.0                | 3.83                           | 13.1            | 12 <sup>3</sup>                       | 175.3                 | 4.88                                                  | -     |      |      |
|                |                                | -               | -                                     | -                    | -                              | 13.1            | 13                                    | 130.5                 | 5.77                                                  | -     |      |      |
|                |                                | <b>His-290*</b> | <b>CE1</b>                            | -                    | -                              | -               | -                                     | 9.8                   | 12 <sup>3</sup>                                       | 175.3 | 4.31 | -0.9 |
|                |                                |                 |                                       | 10.7                 | 17                             | 142.1           | 5.46                                  | -                     | -                                                     | -     | -    | -    |
| 10.7           | 18                             |                 |                                       | 134.2                | 4.42                           | -               | -                                     | -                     | -                                                     | -     |      |      |
| 10.7           | 18 <sup>1</sup>                |                 |                                       | 16.5                 | 4.55                           | -               | -                                     | -                     | -                                                     | -     |      |      |
| 10.7           | 18 <sup>2</sup>                |                 |                                       | 13.2                 | 3.48                           | -               | -                                     | -                     | -                                                     | -     |      |      |
| 10.7           | 19                             |                 |                                       | 172.7                | 3.87                           | -               | -                                     | -                     | -                                                     | -     |      |      |

\*Continued on following page.

| Proton contact | Pr                             |                 |                                       |                      |      | Pfr                            |                 |                                       |                       |      | $\Delta\sigma^{\text{proton (Pfr-Pr)}} \text{ (ppm)}$ |
|----------------|--------------------------------|-----------------|---------------------------------------|----------------------|------|--------------------------------|-----------------|---------------------------------------|-----------------------|------|-------------------------------------------------------|
|                | $\sigma^{\text{proton}}$ (ppm) | Cofactor carbon | $\sigma^{\text{carbon}}$ (ppm) [3, 4] | XRD distance (Å) [6] |      | $\sigma^{\text{proton}}$ (ppm) | Cofactor carbon | $\sigma^{\text{carbon}}$ (ppm) [3, 4] | XRD distance (Å) [14] |      |                                                       |
| His-290        | ND1                            | 11.7            | 18 <sup>1</sup>                       | 16.5                 | 5.63 | -                              | -               | -                                     | -                     | -    | -                                                     |
|                |                                | 11.7            | 18 <sup>2</sup>                       | 13.2                 | 4.38 | -                              | -               | -                                     | -                     | -    | -                                                     |
|                |                                | 11.7            | 19                                    | 172.7                | 5.15 | -                              | -               | -                                     | -                     | -    | -                                                     |
|                | NE2                            | -               | -                                     | -                    | -    | 12.3                           | 12 <sup>3</sup> | 175.3                                 | 3.55                  | -    | -0.4                                                  |
|                |                                | 12.7            | 18                                    | 134.2                | 4.60 | -                              | -               | -                                     | -                     | -    | -                                                     |
|                |                                | 12.7            | 18 <sup>1</sup>                       | 16.5                 | 5.10 | -                              | -               | -                                     | -                     | -    | -                                                     |
|                |                                | 12.7            | 18 <sup>2</sup>                       | 13.2                 | 4.29 | -                              | -               | -                                     | -                     | -    | -                                                     |
|                |                                | 12.7            | 19                                    | 172.7                | 3.68 | -                              | -               | -                                     | -                     | -    |                                                       |
| His-470        | CA                             | 6.7             | 3 <sup>2</sup>                        | 21.9                 | 4.26 | -                              | -               | -                                     | -                     | -    |                                                       |
|                | N                              | 10.4            | 3 <sup>2</sup>                        | 21.9                 | 3.96 | 9.8                            | 3 <sup>2</sup>  | 21.4                                  | -                     | -0.6 |                                                       |
| Ile-20         | CB                             | 3.7             | 8 <sup>2</sup>                        | 42.9                 | 4.39 | -                              | -               | -                                     | -                     | -    |                                                       |
|                | CD1                            | 2.5             | 8 <sup>1</sup>                        | 22.8                 | 4.11 | 2.3                            | 8 <sup>1</sup>  | 22.9                                  | -                     | -0.2 |                                                       |
|                |                                | 2.5             | 8 <sup>2</sup>                        | 42.9                 | 3.60 | 2.3                            | 8 <sup>2</sup>  | 41.8                                  | -                     | -    |                                                       |
|                |                                | 2.5             | 8 <sup>3</sup>                        | 180.1                | 3.53 | 2.3                            | 8 <sup>3</sup>  | 180.3                                 | -                     | -    |                                                       |
|                | CG1                            | 3.2             | 8 <sup>3</sup>                        | 180.1                | 4.29 | -                              | -               | -                                     | -                     | -    |                                                       |
|                | CG2                            | -               | -                                     | -                    | -    | 2.0                            | 7 <sup>1</sup>  | 9.2                                   | -                     | -1.0 |                                                       |
|                |                                | 3.0             | 8 <sup>2</sup>                        | 42.9                 | 4.16 | -                              | -               | -                                     | -                     | -    |                                                       |
| Ile-208*       | CB                             | -               | -                                     | -                    | -    | 4.7                            | 9               | 131.0                                 | 5.17                  | +0.3 |                                                       |
|                |                                | -               | -                                     | -                    | -    | 4.7                            | 10              | 112.4                                 | 5.02                  | -    |                                                       |
|                |                                | -               | -                                     | -                    | -    | 4.7                            | 11              | 131.0                                 | 4.80                  | -    |                                                       |
|                |                                | -               | -                                     | -                    | -    | 4.7                            | 12              | 145.8                                 | 5.22                  | -    |                                                       |
|                |                                | 4.4             | 13                                    | 126.5                | 4.88 | 4.7                            | 13              | 130.5                                 | 5.42                  | -    |                                                       |
|                |                                | -               | -                                     | -                    | -    | 4.7                            | 14              | 152.0                                 | 5.27                  | -    |                                                       |
|                |                                | -               | -                                     | -                    | -    | 2.9                            | 10              | 112.4                                 | 4.43                  | +0.1 |                                                       |
|                | CD1                            | -               | -                                     | -                    | -    | 2.9                            | 11              | 131.0                                 | 3.82                  | -    |                                                       |
|                |                                | -               | -                                     | -                    | -    | 2.9                            | 12              | 145.8                                 | 3.54                  | -    |                                                       |
|                |                                | -               | -                                     | -                    | -    | 2.9                            | 12 <sup>1</sup> | 20.6                                  | 3.79                  | -    |                                                       |
|                |                                | 2.8             | 13                                    | 126.5                | 3.76 | 2.9                            | 13              | 130.5                                 | 3.67                  | -    |                                                       |
|                |                                | 2.8             | 13 <sup>1</sup>                       | 11.4                 | 3.96 | 2.9                            | 13 <sup>1</sup> | 11.3                                  | 4.15                  | -    |                                                       |
|                |                                | 2.8             | 14                                    | 146.1                | 3.58 | 2.9                            | 14              | 152.0                                 | 4.13                  | -    |                                                       |
|                |                                | 2.8             | 15                                    | 93.2                 | 3.74 | -                              | -               | -                                     | -                     | -    |                                                       |
|                |                                | 2.8             | 16                                    | 146.1                | 4.44 | -                              | -               | -                                     | -                     | -    |                                                       |

\*Continued on following page.

| Proton contact | Pr                             |                 |                                       |                      |      | Pfr                            |                 |                                       |                       |      | $\Delta\sigma^{\text{proton (Pfr-Pr)}} \text{ (ppm)}$ |
|----------------|--------------------------------|-----------------|---------------------------------------|----------------------|------|--------------------------------|-----------------|---------------------------------------|-----------------------|------|-------------------------------------------------------|
|                | $\sigma^{\text{proton}}$ (ppm) | Cofactor carbon | $\sigma^{\text{carbon}}$ (ppm) [3, 4] | XRD distance (Å) [6] |      | $\sigma^{\text{proton}}$ (ppm) | Cofactor carbon | $\sigma^{\text{carbon}}$ (ppm) [3, 4] | XRD distance (Å) [14] |      |                                                       |
| Ile-208        | CG1                            | -               | -                                     | -                    | -    | 3.3                            | 11              | 131.0                                 | 3.78                  | -    | -0.1                                                  |
|                |                                | -               | -                                     | -                    | -    | 3.3                            | 12              | 145.8                                 | 3.99                  |      |                                                       |
|                |                                | -               | -                                     | -                    | -    | 3.3                            | 12 <sup>1</sup> | 20.6                                  | 4.68                  |      |                                                       |
|                |                                | 3.4             | 13                                    | 126.5                | 4.06 | 3.3                            | 13              | 130.5                                 | 3.99                  |      |                                                       |
|                |                                | 3.4             | 14                                    | 146.1                | 3.44 | 3.3                            | 14              | 152.0                                 | 3.91                  |      |                                                       |
|                | 3.4                            | 15              | 93.2                                  | 3.59                 | 3.3  | 15                             | 91.5            | 4.61                                  |                       |      |                                                       |
|                | 3.4                            | 16              | 146.1                                 | 4.64                 | -    | -                              | -               | -                                     | -                     |      |                                                       |
|                | CG2                            | -               | -                                     | -                    | -    | 3.1                            | 8               | 143.6                                 | 5.48                  | -0.4 |                                                       |
|                |                                | -               | -                                     | -                    | -    | -                              | -               | -                                     | -                     | -    |                                                       |
|                |                                | 3.5             | 10                                    | 112.8                | 4.72 | -                              | -               | -                                     | -                     | -    |                                                       |
| 3.5            | 11                             | 127.9           | 4.26                                  | -                    | -    | -                              | -               | -                                     |                       |      |                                                       |
| N              | 10.3                           | 15              | 93.2                                  | 4.95                 | -    | -                              | -               | -                                     | -                     | -    |                                                       |
| Leu-15         | CD1                            | 3.2             | 2 <sup>1</sup>                        | 17.4                 | 4.07 | 2.8                            | 2 <sup>1</sup>  | 18.2                                  | -                     | -0.4 |                                                       |
|                | CD2                            | 3.0             | 2                                     | 37.1                 | 4.80 | -                              | -               | -                                     | -                     | -0.4 |                                                       |
|                |                                | 3.0             | 3                                     | 53.3                 | 3.82 | 2.6                            | 3               | 54.3                                  | -                     |      |                                                       |
|                |                                | 3.0             | 3 <sup>1</sup>                        | 47.5                 | 4.49 | 2.6                            | 3 <sup>1</sup>  | 49.9                                  | -                     |      |                                                       |
|                |                                | 3.0             | 4                                     | 154.0                | 4.39 | 2.6                            | 4               | 153.7                                 | -                     |      |                                                       |
| Leu-18         | CD1                            | 2.5             | 7 <sup>1</sup>                        | 9.3                  | 3.99 | -                              | -               | -                                     | -                     | -    |                                                       |
| Leu-469        | CB                             | 3.2             | 3 <sup>2</sup>                        | 21.9                 | 3.39 | 3.4                            | 3 <sup>2</sup>  | 21.4                                  | -                     | +0.2 |                                                       |
| Met-174        | CE                             | -               | -                                     | -                    | -    | 3.2                            | 17 <sup>1</sup> | 9.9                                   | 5.92                  | -0.6 |                                                       |
|                |                                | 3.8             | 18                                    | 134.2                | 4.65 | -                              | -               | -                                     | -                     |      |                                                       |
|                |                                | 3.8             | 18 <sup>1</sup>                       | 16.5                 | 4.22 | 3.2                            | 18 <sup>1</sup> | 15.7                                  | 4.73                  |      |                                                       |
|                |                                | 3.8             | 18 <sup>2</sup>                       | 13.2                 | 2.95 | -                              | -               | -                                     | -                     |      |                                                       |
|                |                                | 3.8             | 19                                    | 172.7                | 4.32 | -                              | -               | -                                     | -                     |      |                                                       |
| Met-267        | CE                             | 2.9             | 18 <sup>1</sup>                       | 16.5                 | 4.16 | 2.6                            | 18 <sup>1</sup> | 15.7                                  | 4.21                  | -0.3 |                                                       |
|                |                                | 2.9             | 18 <sup>2</sup>                       | 13.2                 | 4.25 | 2.6                            | 18 <sup>2</sup> | 13.3                                  | 4.58                  |      |                                                       |
| Phe-216*       | CE2                            | 7.3             | 12 <sup>1</sup>                       | 20.4                 | 3.78 | 7.0                            | 12 <sup>1</sup> | 20.6                                  | -                     | -0.3 |                                                       |
|                |                                | 7.3             | 12 <sup>2</sup>                       | 38.1                 | 3.73 | 7.0                            | 12 <sup>2</sup> | 38.4                                  | -                     |      |                                                       |

\*Continued on following page.

| Proton contact | Pr                             |                 |                                      |                      | Pfr                            |                 |                                      |                       | $\Delta\sigma^{\text{proton (Pfr-Pr)}} \text{ (ppm)}$ |      |
|----------------|--------------------------------|-----------------|--------------------------------------|----------------------|--------------------------------|-----------------|--------------------------------------|-----------------------|-------------------------------------------------------|------|
|                | $\sigma^{\text{proton}}$ (ppm) | Cofactor carbon | $\sigma^{\text{carbon}}$ (ppm) [3,4] | XRD distance (Å) [6] | $\sigma^{\text{proton}}$ (ppm) | Cofactor carbon | $\sigma^{\text{carbon}}$ (ppm) [3,4] | XRD distance (Å) [14] |                                                       |      |
| Phe-216        | CZ                             | 6.8             | 12 <sup>1</sup>                      | 20.4                 | 4.14                           | 6.5             | 12 <sup>1</sup>                      | 20.6                  | -                                                     | -0.3 |
|                |                                | 6.8             | 12 <sup>2</sup>                      | 38.1                 | 3.61                           | 6.5             | 12 <sup>2</sup>                      | 38.4                  | -                                                     |      |
|                |                                | -               | -                                    | -                    | -                              | 6.5             | 12 <sup>3</sup>                      | 175.3                 | -                                                     |      |
| Pro-209        | CD                             | -               | -                                    | -                    | -                              | 5.6             | 3 <sup>1</sup>                       | 49.9                  | 4.72                                                  | -0.1 |
|                |                                | 5.7             | 6                                    | 149.3                | 3.49                           | 5.6             | 6                                    | 149.3                 | 3.71                                                  |      |
|                |                                | 5.7             | 7                                    | 125.5                | 4.12                           | -               | -                                    | -                     | -                                                     |      |
|                |                                | -               | -                                    | -                    | -                              | 5.6             | 7 <sup>1</sup>                       | 9.2                   | 4.56                                                  |      |
|                |                                | 5.7             | 8                                    | 145.2                | 4.36                           | -               | -                                    | -                     | -                                                     |      |
|                | CG                             | 5.7             | 9                                    | 127.9                | 4.01                           | 5.6             | 9                                    | 131.0                 | 4.72                                                  | -    |
|                |                                | -               | -                                    | -                    | -                              | 5.1             | 3                                    | 54.3                  | 4.36                                                  |      |
|                |                                | -               | -                                    | -                    | -                              | 5.1             | 3 <sup>1</sup>                       | 49.9                  | 3.96                                                  |      |
|                |                                | -               | -                                    | -                    | -                              | 5.1             | 3 <sup>2</sup>                       | 21.4                  | 4.05                                                  |      |
|                |                                | -               | -                                    | -                    | -                              | 5.1             | 6                                    | 149.3                 | 4.26                                                  |      |
| N              | -                              | -               | -                                    | -                    | 11.8                           | 3 <sup>1</sup>  | 49.9                                 | 5.83                  | -                                                     |      |
|                | -                              | -               | -                                    | -                    | 11.8                           | 7               | 126.3                                | 5.43                  |                                                       |      |
| Pro-471        | CA                             | 5.7             | 2                                    | 37.1                 | 4.60                           | 5.3             | 2                                    | 37.3                  | -                                                     | -0.4 |
|                | CB                             | -               | -                                    | -                    | -                              | 3.4             | 2                                    | 37.3                  | -                                                     | -    |
|                | CD                             | 5.3             | 3 <sup>2</sup>                       | 21.9                 | 4.63                           | -               | -                                    | -                     | -                                                     | -    |
|                | N                              | 11.5            | 3 <sup>1</sup>                       | 47.5                 | 4.94                           | -               | -                                    | -                     | -                                                     | -0.1 |
| 11.5           |                                | 3 <sup>2</sup>  | 21.9                                 | 4.22                 | 11.4                           | 3 <sup>2</sup>  | 21.4                                 | -                     | -                                                     |      |
| Ser-206        | CB                             | 4.8             | 2 <sup>1</sup>                       | 17.4                 | 4.31                           | 5.0             | 2 <sup>1</sup>                       | 18.2                  | 5.57                                                  | +0.2 |
|                | OG                             | 8.0             | 2 <sup>1</sup>                       | 17.4                 | 4.25                           | 7.4             | 2 <sup>1</sup>                       | 18.2                  | 5.25                                                  | -0.6 |
| Ser-272        | OG                             | -               | -                                    | -                    | -                              | 6.0             | 12 <sup>2</sup>                      | 38.4                  | 4.75                                                  | -1.0 |
|                |                                | 7.0             | 12 <sup>3</sup>                      | 179.0                | 4.73                           | 6.0             | 12 <sup>3</sup>                      | 175.3                 | 4.86                                                  |      |
| Thr-274*       | CB                             | -               | -                                    | -                    | -                              | 3.4             | 12 <sup>2</sup>                      | 38.4                  | -                                                     | -0.3 |
|                |                                | 3.7             | 12 <sup>3</sup>                      | 179.0                | 3.94                           | 3.4             | 12 <sup>3</sup>                      | 175.3                 | -                                                     |      |
|                |                                | 3.7             | 13 <sup>1</sup>                      | 11.4                 | 4.87                           | -               | -                                    | -                     | -                                                     |      |
|                | CG2                            | 2.1             | 12 <sup>1</sup>                      | 20.4                 | 4.72                           | -               | -                                    | -                     | -                                                     | +0.7 |
|                |                                | 2.1             | 12 <sup>2</sup>                      | 38.1                 | 3.53                           | 2.8             | 12 <sup>2</sup>                      | 38.4                  | -                                                     |      |
|                |                                | 2.1             | 13 <sup>1</sup>                      | 11.4                 | 4.20                           | -               | -                                    | -                     | -                                                     |      |

\*Continued on following page.

| Proton contact | Pr                             |                 |                                       |                      |      | Pfr                            |                 |                                       |                       |   | $\Delta\sigma^{\text{proton (Pfr-Pr)}} \text{ (ppm)}$ |
|----------------|--------------------------------|-----------------|---------------------------------------|----------------------|------|--------------------------------|-----------------|---------------------------------------|-----------------------|---|-------------------------------------------------------|
|                | $\sigma^{\text{proton}}$ (ppm) | Cofactor carbon | $\sigma^{\text{carbon}}$ (ppm) [3, 4] | XRD distance (Å) [6] |      | $\sigma^{\text{proton}}$ (ppm) | Cofactor carbon | $\sigma^{\text{carbon}}$ (ppm) [3, 4] | XRD distance (Å) [14] |   |                                                       |
| Thr-274        | OG1                            | 10.7            | 12 <sup>2</sup>                       | 38.1                 | 3.14 | 10.6                           | 12 <sup>2</sup> | 38.4                                  | -                     | - | -0.1                                                  |
|                |                                | 10.7            | 12 <sup>3</sup>                       | 179.0                | 3.14 | 10.6                           | 12 <sup>3</sup> | 175.3                                 | -                     | - |                                                       |
|                |                                | 10.7            | 13 <sup>1</sup>                       | 11.4                 | 4.21 | -                              | -               | -                                     | -                     | - |                                                       |
| Tyr-176        | CE1                            | -               | -                                     | -                    | -    | 9.3                            | 13 <sup>1</sup> | 11.3                                  | 3.47                  | - | +0.5                                                  |
|                |                                | 8.8             | 17                                    | 142.1                | 4.67 | -                              | -               | -                                     | -                     | - |                                                       |
|                |                                | 8.8             | 18                                    | 134.2                | 4.72 | -                              | -               | -                                     | -                     | - |                                                       |
|                | CE2                            | -               | -                                     | -                    | -    | 9.5                            | 17 <sup>1</sup> | 9.9                                   | 5.93                  | - | -0.1                                                  |
|                |                                | -               | -                                     | -                    | -    | 9.0                            | 12 <sup>3</sup> | 175.3                                 | 3.94                  | - |                                                       |
|                |                                | 9.1             | 17 <sup>1</sup>                       | 9.9                  | 4.55 | 9.0                            | 17 <sup>1</sup> | 9.9                                   | 4.24                  | - |                                                       |
| Tyr-198        | CD2                            | 10.0            | 18 <sup>2</sup>                       | 13.2                 | 3.46 | -                              | -               | -                                     | -                     | - | -                                                     |
|                | CE2                            | 9.4             | 18 <sup>2</sup>                       | 13.2                 | 3.75 | -                              | -               | -                                     | -                     | - | -                                                     |
| Tyr-203*       | CA                             | -               | -                                     | -                    | -    | 5.2                            | 19              | 169.0                                 | 5.54                  | - | -                                                     |
|                | CB                             | -               | -                                     | -                    | -    | 4.6                            | 15              | 91.5                                  | 5.08                  | - | +0.9                                                  |
|                |                                | -               | -                                     | -                    | -    | 4.6                            | 16              | 151.1                                 | 4.72                  | - |                                                       |
|                |                                | -               | -                                     | -                    | -    | 4.6                            | 17              | 137.7                                 | 5.72                  | - |                                                       |
|                |                                | 3.7             | 17 <sup>1</sup>                       | 9.9                  | 4.22 | -                              | -               | -                                     | -                     | - |                                                       |
|                |                                | -               | -                                     | -                    | -    | 4.6                            | 18              | 140.4                                 | 5.46                  | - |                                                       |
|                | CD1                            | -               | -                                     | -                    | -    | 4.6                            | 19              | 169.0                                 | 4.24                  | - | -                                                     |
|                |                                | -               | -                                     | -                    | -    | 10.0                           | 17 <sup>1</sup> | 9.9                                   | 5.98                  | - |                                                       |
|                |                                | -               | -                                     | -                    | -    | 10.0                           | 18              | 140.4                                 | 4.43                  | - |                                                       |
|                |                                | -               | -                                     | -                    | -    | 10.0                           | 19              | 169.0                                 | 3.65                  | - |                                                       |
|                |                                | -               | -                                     | -                    | -    | 9.8                            | 13 <sup>1</sup> | 11.3                                  | 5.18                  | - |                                                       |
|                | CD2                            | -               | -                                     | -                    | -    | 9.8                            | 15              | 91.5                                  | 4.85                  | - | -0.2                                                  |
|                |                                | -               | -                                     | -                    | -    | 9.8                            | 17 <sup>1</sup> | 9.9                                   | 3.67                  | - |                                                       |
|                |                                | 10.0            | 17 <sup>1</sup>                       | 9.9                  | 3.67 | -                              | -               | -                                     | -                     | - |                                                       |
|                | CE1                            | 10.0            | 18 <sup>1</sup>                       | 16.5                 | 4.16 | -                              | -               | -                                     | -                     | - | -                                                     |
|                |                                | -               | -                                     | -                    | -    | 9.5                            | 17              | 137.7                                 | 4.93                  | - |                                                       |
|                |                                | -               | -                                     | -                    | -    | 9.5                            | 18              | 140.4                                 | 4.75                  | - |                                                       |
|                |                                | -               | -                                     | -                    | -    | 9.5                            | 19              | 169.0                                 | 4.34                  | - |                                                       |
|                |                                | -               | -                                     | -                    | -    | 9.3                            | 13              | 130.5                                 | 5.15                  | - |                                                       |
|                | CE2                            | 9.4             | 18 <sup>1</sup>                       | 16.5                 | 3.71 | -                              | -               | -                                     | -                     | - | -0.1                                                  |

\*Continued on following page.



| Proton contact | Pr                             |                 |                                       |                      |      | Pfr                            |                 |                                       |                       |   | $\Delta\sigma^{\text{proton (Pfr-Pr)}} \text{ (ppm)}$ |
|----------------|--------------------------------|-----------------|---------------------------------------|----------------------|------|--------------------------------|-----------------|---------------------------------------|-----------------------|---|-------------------------------------------------------|
|                | $\sigma^{\text{proton}}$ (ppm) | Cofactor carbon | $\sigma^{\text{carbon}}$ (ppm) [3, 4] | XRD distance (Å) [6] |      | $\sigma^{\text{proton}}$ (ppm) | Cofactor carbon | $\sigma^{\text{carbon}}$ (ppm) [3, 4] | XRD distance (Å) [14] |   |                                                       |
| Tyr-203        | OH                             | -               | -                                     | -                    | -    | 7.3                            | 17 <sup>1</sup> | 9.9                                   | 6.65                  | - | <b>-0.7</b>                                           |
|                |                                | 8.0             | 18 <sup>1</sup>                       | 16.5                 | 4.00 | -                              | -               | -                                     | -                     | - |                                                       |
|                |                                | 8.0             | 18 <sup>2</sup>                       | 13.2                 | 4.12 | -                              | -               | -                                     | -                     | - |                                                       |
| Tyr-257        | CB                             | 4.5             | 7 <sup>1</sup>                        | 9.3                  | 3.47 | 3.6                            | 7 <sup>1</sup>  | 9.2                                   | -                     | - | <b>-0.9</b>                                           |
|                |                                | 4.5             | 8 <sup>2</sup>                        | 42.9                 | 3.88 | -                              | -               | -                                     | -                     | - |                                                       |
|                |                                | 4.5             | 8 <sup>3</sup>                        | 180.1                | 4.45 | -                              | -               | -                                     | -                     | - |                                                       |
|                | CD2                            | 9.6             | 7 <sup>1</sup>                        | 9.3                  | 3.34 | 9.7                            | 7 <sup>1</sup>  | 9.2                                   | -                     | - | <b>+0.1</b>                                           |
|                | N                              | 9.8             | 8 <sup>2</sup>                        | 42.9                 | 3.81 | -                              | -               | -                                     | -                     | - | -                                                     |
|                |                                | 9.8             | 8 <sup>3</sup>                        | 180.1                | 3.69 | -                              | -               | -                                     | -                     | - | -                                                     |
| Tyr-263        | CD2                            | -               | -                                     | -                    | -    | 9.4                            | 1               | 182.9                                 | 4.04                  | - | -                                                     |
|                | CE1                            | 9.7             | 15                                    | 93.2                 | 4.33 | 9.0                            | 15              | 91.5                                  | 5.00                  | - | <b>-0.7</b>                                           |
|                |                                | 9.7             | 16                                    | 146.1                | 4.29 | 9.0                            | 16              | 151.1                                 | 4.26                  | - |                                                       |
|                |                                | 9.7             | 17                                    | 142.1                | 4.15 | 9.0                            | 17              | 137.7                                 | 3.95                  | - |                                                       |
|                |                                | -               | -                                     | -                    | -    | 9.0                            | 18              | 140.4                                 | 4.00                  | - |                                                       |
|                | -                              | -               | -                                     | -                    | 9.0  | 18 <sup>1</sup>                | 15.7            | 4.37                                  | -                     | - |                                                       |
|                | -                              | -               | -                                     | -                    | 9.0  | 19                             | 169.0           | 4.30                                  | -                     | - |                                                       |
|                | CE2                            | -               | -                                     | -                    | -    | 8.8                            | 1               | 182.9                                 | 4.37                  | - | -                                                     |
|                |                                | -               | -                                     | -                    | -    | 8.8                            | 14              | 152.0                                 | 5.35                  | - | -                                                     |
|                | OH                             | -               | -                                     | -                    | -    | 7.7                            | 14              | 152.0                                 | 5.96                  | - | <b>-0.5</b>                                           |
|                |                                | -               | -                                     | -                    | -    | 7.7                            | 15              | 91.5                                  | 4.61                  | - |                                                       |
|                |                                | -               | -                                     | -                    | -    | 7.7                            | 16              | 151.1                                 | 3.70                  | - |                                                       |
|                |                                | 8.2             | 17                                    | 142.1                | 3.54 | 7.7                            | 17              | 137.7                                 | 3.92                  | - |                                                       |
|                |                                | 8.2             | 18                                    | 134.2                | 4.30 | 7.7                            | 18              | 140.4                                 | 3.55                  | - |                                                       |
|                |                                | 8.2             | 18 <sup>1</sup>                       | 16.5                 | 4.56 | 7.7                            | 18 <sup>1</sup> | 15.7                                  | 4.26                  | - |                                                       |
|                |                                | -               | -                                     | -                    | -    | 7.7                            | 18 <sup>2</sup> | 13.3                                  | 4.54                  | - |                                                       |
| -              |                                | -               | -                                     | -                    | 7.7  | 19                             | 169.0           | 3.04                                  | -                     |   |                                                       |
| Tyr-458        | CB                             | 3.7             | 2                                     | 37.1                 | 4.47 | -                              | -               | -                                     | -                     | - |                                                       |
|                |                                | 3.7             | 2 <sup>1</sup>                        | 17.4                 | 3.68 | -                              | -               | -                                     | -                     | - |                                                       |
| Val-186        | CG2                            | 1.6             | 18 <sup>1</sup>                       | 16.5                 | 4.76 | 1.5                            | 18 <sup>1</sup> | 15.7                                  | 6.19                  | - | <b>-0.1</b>                                           |
|                |                                | -               | -                                     | -                    | -    | 1.5                            | 18 <sup>2</sup> | 13.3                                  | 5.69                  | - |                                                       |

| Proton contact | Pr                             |                 |                                       |                      |      | Pfr                            |                 |                                       |                       |      | $\Delta\sigma^{\text{proton (Pfr-Pr)}} \text{ (ppm)}$ |
|----------------|--------------------------------|-----------------|---------------------------------------|----------------------|------|--------------------------------|-----------------|---------------------------------------|-----------------------|------|-------------------------------------------------------|
|                | $\sigma^{\text{proton}}$ (ppm) | Cofactor carbon | $\sigma^{\text{carbon}}$ (ppm) [3, 4] | XRD distance (Å) [6] |      | $\sigma^{\text{proton}}$ (ppm) | Cofactor carbon | $\sigma^{\text{carbon}}$ (ppm) [3, 4] | XRD distance (Å) [14] |      |                                                       |
| W1             | W1-I                           | 7.2             | 1                                     | 184.1                | 3.05 | -                              | -               | -                                     | -                     | -    | -                                                     |
|                |                                | 7.2             | 9                                     | 127.9                | 3.90 | -                              | -               | -                                     | -                     | -    | -                                                     |
|                |                                | 7.2             | 10                                    | 112.8                | 4.15 | -                              | -               | -                                     | -                     | -    | -                                                     |
|                |                                | 7.2             | 11                                    | 127.9                | 3.93 | -                              | -               | -                                     | -                     | -    | -                                                     |
|                | W1-II                          | 7.7             | 1                                     | 184.1                | 3.05 | 7.1                            | 1               | 182.9                                 | 3.37                  | -    | -0.6                                                  |
|                |                                | 7.7             | 8                                     | 145.2                | 5.18 | -                              | -               | -                                     | -                     | -    | -                                                     |
|                |                                | 7.7             | 9                                     | 127.9                | 3.90 | 7.1                            | 9               | 131.0                                 | 3.88                  | -    | -                                                     |
|                |                                | 7.7             | 10                                    | 112.8                | 4.15 | 7.1                            | 10              | 112.4                                 | 4.23                  | -    | -                                                     |
|                |                                | 7.7             | 11                                    | 127.9                | 3.93 | 7.1                            | 11              | 131.0                                 | 3.78                  | -    | -                                                     |
|                |                                | 7.7             | 12                                    | 145.2                | 5.16 | 7.1                            | 12              | 145.8                                 | 4.75                  | -    | -                                                     |
|                |                                | -               | -                                     | -                    | -    | 7.1                            | 13              | 130.5                                 | 4.63                  | -    | -                                                     |
|                |                                | 7.7             | 14                                    | 146.1                | 4.05 | 7.1                            | 14              | 152.0                                 | 3.51                  | -    | -                                                     |
|                |                                | 7.7             | 15                                    | 93.2                 | 4.08 | 7.1                            | 15              | 91.5                                  | 3.60                  | -    | -                                                     |
|                |                                | -               | -                                     | -                    | -    | 7.1                            | 16              | 151.1                                 | 4.58                  | -    | -                                                     |
| W2             | 7.9                            | 8 <sup>1</sup>  | 22.8                                  | 4.74                 | 8.1  | 8 <sup>1</sup>                 | 22.9            | -                                     | -                     | +0.2 |                                                       |
|                | 7.9                            | 8 <sup>2</sup>  | 42.9                                  | 4.70                 | 8.1  | 8 <sup>2</sup>                 | 41.8            | -                                     | -                     | -    |                                                       |
|                | 7.9                            | 8 <sup>3</sup>  | 180.1                                 | 3.90                 | 8.1  | 8 <sup>3</sup>                 | 180.3           | -                                     | -                     | -    |                                                       |
|                | 7.9                            | 12 <sup>1</sup> | 20.4                                  | 4.48                 | -    | -                              | -               | -                                     | -                     | -    |                                                       |
|                | 7.9                            | 12 <sup>2</sup> | 38.1                                  | 4.44                 | -    | -                              | -               | -                                     | -                     | -    |                                                       |
|                | 7.9                            | 12 <sup>3</sup> | 179.0                                 | 3.59                 | -    | -                              | -               | -                                     | -                     | -    |                                                       |
| W3             | 8.0                            | 12 <sup>2</sup> | 38.1                                  | 4.59                 | 7.5  | 12 <sup>2</sup>                | 38.4            | -                                     | -                     | -0.5 |                                                       |
|                | 8.0                            | 12 <sup>3</sup> | 179.0                                 | 3.10                 | 7.5  | 12 <sup>3</sup>                | 175.3           | -                                     | -                     | -    |                                                       |
| W4 (-II)       | 9.0                            | 12              | 145.2                                 | 5.25                 | -    | -                              | -               | -                                     | -                     | -1.1 |                                                       |
|                | -                              | -               | -                                     | -                    | 7.9  | 12 <sup>1</sup>                | 20.6            | -                                     | -                     | -    |                                                       |
|                | 8.9                            | 12 <sup>2</sup> | 38.1                                  | 4.59                 | -    | -                              | -               | -                                     | -                     | -    |                                                       |
|                | 8.9                            | 12 <sup>3</sup> | 179.0                                 | 3.50                 | 7.9  | 12 <sup>3</sup>                | 175.3           | -                                     | -                     | -    |                                                       |
| -              | -                              | -               | -                                     | -                    | 7.9  | 17 <sup>1</sup>                | 9.9             | -                                     | -                     | -    |                                                       |

| Proton contact                     | Pr                             |                 |                                       |                      | Pfr                            |                 |                                       |                       | $\Delta\sigma^{\text{proton (Pfr-Pr)}} \text{ (ppm)}$ |
|------------------------------------|--------------------------------|-----------------|---------------------------------------|----------------------|--------------------------------|-----------------|---------------------------------------|-----------------------|-------------------------------------------------------|
|                                    | $\sigma^{\text{proton}}$ (ppm) | Cofactor carbon | $\sigma^{\text{carbon}}$ (ppm) [3, 4] | XRD distance (Å) [6] | $\sigma^{\text{proton}}$ (ppm) | Cofactor carbon | $\sigma^{\text{carbon}}$ (ppm) [3, 4] | XRD distance (Å) [14] |                                                       |
| <b>W5 (-II)</b>                    | -                              | -               | -                                     | -                    | 8.5                            | 12              | 145.8                                 | -                     | <b>+0.7</b>                                           |
|                                    | -                              | -               | -                                     | -                    | 8.5                            | 12 <sup>1</sup> | 20.6                                  | -                     |                                                       |
|                                    | -                              | -               | -                                     | -                    | 8.5                            | 12 <sup>3</sup> | 175.3                                 | -                     |                                                       |
|                                    | 7.8                            | 13              | 126.5                                 | 4.32                 | 8.5                            | 13              | 130.5                                 | -                     |                                                       |
|                                    | 7.8                            | 13 <sup>1</sup> | 11.4                                  | 3.73                 | 8.5                            | 13 <sup>1</sup> | 11.3                                  | -                     |                                                       |
|                                    | -                              | -               | -                                     | -                    | 8.5                            | 17 <sup>1</sup> | 9.9                                   | -                     |                                                       |
|                                    | -                              | -               | -                                     | -                    | 8.5                            | 18 <sup>1</sup> | 15.7                                  | -                     |                                                       |
|                                    | 7.8                            | 19              | 172.7                                 | 3.75                 | -                              | -               | -                                     | -                     |                                                       |
| <b>W6</b>                          | 8.4                            | 12 <sup>3</sup> | 179.0                                 | 4.92                 | -                              | -               | -                                     | -                     | <b>-0.6</b>                                           |
|                                    | 8.4                            | 13 <sup>1</sup> | 11.4                                  | 4.53                 | 7.8                            | 13 <sup>1</sup> | 11.3                                  | -                     |                                                       |
| <b>W7</b>                          | 7.7                            | 17 <sup>1</sup> | 9.9                                   | 5.56                 | -                              | -               | -                                     | -                     | -                                                     |
| <b>{W5+[OH]<sub>w4</sub>} (-I)</b> | 9.4                            | 12              | 145.2                                 | -                    | -                              | -               | -                                     | -                     | -                                                     |
|                                    | 9.4                            | 12 <sup>2</sup> | 38.1                                  | -                    | -                              | -               | -                                     | -                     |                                                       |
|                                    | 9.4                            | 12 <sup>3</sup> | 179.0                                 | -                    | -                              | -               | -                                     | -                     |                                                       |
|                                    | 9.4                            | 13 <sup>1</sup> | 11.4                                  | -                    | -                              | -               | -                                     | -                     |                                                       |
|                                    | 9.4                            | 14              | 146.1                                 | -                    | -                              | -               | -                                     | -                     |                                                       |
|                                    | 9.4                            | 16              | 146.1                                 | -                    | -                              | -               | -                                     | -                     |                                                       |
|                                    | 9.4                            | 19              | 172.7                                 | -                    | -                              | -               | -                                     | -                     |                                                       |
