# Supplementary material
Source: PubMed Central journal article supplement (PMC3054036)
Supplement: 1013377108_SD05.pdf [file 1013377108_SD05.pdf]

**Dataset S5.** Sequence comparison of Cph1 with PaBphP in the chromophore-binding GAF domains. The residue codes, ranging from 157–280, for PaBphP sequence are given in parentheses following the equivalent codes for Cph1 sequence (residue range of 170–293). Gray shading indicates residues conserved in both phytochromes. Entries in red boldface indicate the long-range intermolecular <sup>1</sup>H contacts of the chromophore detected in the Pr state, as shown in Fig. 1, B and C.

| Residue             | PDB ID codes |           |
|---------------------|--------------|-----------|---------------------|--------------|-----------|---------------------|--------------|-----------|---------------------|--------------|-----------|---------------------|--------------|-----------|
|                     | 2VEA [6]     | 3C2W [14] |
| 170 (157)           | PHE          | TYR       | 195 (182)           | MET          | LEU       | 220 (207)           | PRO          | PRO       | 245 (232)           | ALA          | SER       | 270 (257)           | GLY          | ARG       |
| 171 (158)           | ASP          | ASP       | 196 (183)           | GLU          | GLU       | 221 (208)           | ILE          | ILE       | 246 (233)           | VAL          | PHE       | 271 (258)           | ALA          | ALA       |
| 172 (159)           | ARG          | ARG       | 197 (184)           | PRO          | SER       | 222 (209)           | <b>ARG</b>   | ARG       | 247 (234)           | ASP          | ASP       | 272 (259)           | <b>SER</b>   | SER       |
| 173 (160)           | VAL          | VAL       | 198 (185)           | <b>TYR</b>   | TYR       | 223 (210)           | VAL          | LEU       | 248 (235)           | LEU          | LEU       | 273 (260)           | LEU          | MET       |
| 174 (161)           | <b>MET</b>   | MET       | 199 (186)           | LEU          | LEU       | 224 (211)           | ILE          | ILE       | 249 (236)           | THR          | SER       | 274 (261)           | <b>THR</b>   | SER       |
| 175 (162)           | LEU          | ALA       | 200 (187)           | GLY          | GLY       | 225 (212)           | PRO          | ALA       | 250 (237)           | GLU          | TYR       | 275 (262)           | ILE          | ILE       |
| 176 (163)           | <b>TYR</b>   | TYR       | 201 (188)           | LEU          | GLN       | 226 (213)           | ASP          | ASP       | 251 (238)           | SER          | SER       | 276 (263)           | SER          | SER       |
| 177 (164)           | ARG          | ARG       | 202 (189)           | HIS          | ARG       | 227 (214)           | VAL          | VAL       | 252 (239)           | ILE          | VAL       | 277 (264)           | LEU          | ILE       |
| 178 (165)           | PHE          | PHE       | 203 (190)           | <b>TYR</b>   | TYR       | 228 (215)           | TYR          | ALA       | 253 (240)           | LEU          | LEU       | 278 (265)           | ILE          | VAL       |
| 179 (166)           | ASP          | ARG       | 204 (191)           | PRO          | PRO       | 229 (216)           | GLY          | TYR       | 254 (241)           | <b>ARG</b>   | ARG       | 279 (266)           | LYS          | VAL       |
| 180 (167)           | GLU          | HIS       | 205 (192)           | GLU          | ALA       | 230 (217)           | VAL          | THR       | 255 (242)           | SER          | SER       | 280 (267)           | ASP          | GLY       |
| 181 (168)           | ASN          | ASP       | 206 (193)           | <b>SER</b>   | SER       | 231 (218)           | ALA          | PRO       | 256 (243)           | <b>ALA</b>   | VAL       | 281 (268)           | GLY          | GLY       |
| 182 (169)           | ASN          | ASP       | 207 (194)           | <b>ASP</b>   | ASP       | 232 (219)           | VAL          | MET       | 257 (244)           | <b>TYR</b>   | SER       | 282 (269)           | HIS          | LYS       |
| 183 (170)           | HIS          | SER       | 208 (195)           | <b>ILE</b>   | ILE       | 233 (220)           | PRO          | ARG       | 258 (245)           | HIS          | PRO       | 283 (270)           | LEU          | LEU       |
| 184 (171)           | GLY          | GLY       | 209 (196)           | <b>PRO</b>   | PRO       | 234 (221)           | LEU          | VAL       | 259 (246)           | <b>CYS</b>   | ILE       | 284 (271)           | TRP          | TRP       |
| 185 (172)           | ASP          | GLU       | 210 (197)           | GLN          | ALA       | 235 (222)           | THR          | PHE       | 260 (247)           | <b>HIS</b>   | HIS       | 285 (272)           | GLY          | GLY       |
| 186 (173)           | <b>VAL</b>   | VAL       | 211 (198)           | PRO          | GLN       | 236 (223)           | PRO          | PRO       | 261 (248)           | LEU          | CYS       | 286 (273)           | LEU          | LEU       |
| 187 (174)           | ILE          | VAL       | 212 (199)           | <b>ALA</b>   | ALA       | 237 (224)           | ALA          | ALA       | 262 (249)           | THR          | GLU       | 287 (274)           | ILE          | PHE       |
| 188 (175)           | ALA          | ALA       | 213 (200)           | ARG          | ARG       | 238 (225)           | VAL          | LEU       | 263 (250)           | <b>TYR</b>   | TYR       | 288 (275)           | <b>ALA</b>   | SER       |
| 189 (176)           | GLU          | GLU       | 214 (201)           | ARG          | ARG       | 239 (226)           | ASN          | ASN       | 264 (251)           | LEU          | LEU       | 289 (276)           | CYS          | CYS       |
| 190 (177)           | ASP          | SER       | 215 (202)           | LEU          | LEU       | 240 (227)           | PRO          | PRO       | 265 (252)           | LYS          | THR       | 290 (277)           | <b>HIS</b>   | HIS       |
| 191 (178)           | LYS          | ARG       | 216 (203)           | <b>PHE</b>   | TYR       | 241 (228)           | SER          | GLU       | 266 (253)           | ASN          | ASN       | 291 (278)           | HIS          | HIS       |
| 192 (179)           | ARG          | ARG       | 217 (204)           | ILE          | ILE       | 242 (229)           | THR          | THR       | 267 (254)           | <b>MET</b>   | MET       | 292 (279)           | GLN          | MET       |
| 193 (180)           | ASP          | GLU       | 218 (205)           | HIS          | GLN       | 243 (230)           | ASN          | ASN       | 268 (255)           | GLY          | GLY       | 293 (280)           | THR          | SER       |
| 194 (181)           | ASP          | ASP       | 219 (206)           | ASN          | ASN       | 244 (231)           | ARG          | GLU       | 269 (256)           | VAL          | VAL       | -                   | -            | -         |
| 170 (157)–194 (181) |              |           | 195 (182)–219 (206) |              |           | 220 (207)–244 (231) |              |           | 245 (232)–269 (256) |              |           | 270 (257)–293 (280) |              |           |
